# Supplementary material for: Metabolic Profiling and Gene Expression Analysis Unveil Differences in Flavonoid and Lipid Metabolisms Between ‘Huapi’ Kumquat (Fortunella crassifolia Swingle) and Its Wild Type
Source: Front Plant Sci. 2021 Dec 2;12:759968. doi: 10.3389/fpls.2021.759968 (PMC8675212; doi:10.3389/fpls.2021.759968)
Supplement: Supplementary file 2 [file Table_1.XLSX]

## Sheet: 538 identified metabolites
Supplementary Table S1. Total 538 identified metabolites in the RA and HP kumquat fruits.
Index	Ion mode	Q1 (Da)	Q3 (Da)	Rt (min)	Molecular Weight (Da)	KEGG ID	Compounds	Class	RAP1	RAP2	RAP3	RAF1	RAF2	RAF3	HPP1	HPP2	HPP3	HPF1	HPF2	HPF3
Cit1020	Negative	188.1	145.2	0.78	189.111	C02427	L-Homocitrulline	Amino acids	13800	16500	20000	9	8200	6650	34700	24800	31200	25300	28000	41500
Cit252	Positive	116.1	70	0.79	115.063	C00148	L-Proline	Amino acids	484000	530000	517000	545000	896000	820000	253000	235000	161000	695000	572000	703000
Cit1011	Negative	174.1	131.1	0.72	175.096	C00327	L-Citrulline	Amino acids	325000	364000	388000	470000	867000	694000	190000	186000	176000	662000	671000	609000
Cit254	Positive	106	59.9	0.74	105.043	C00065	L-Serine	Amino acids	397000	303000	515000	521000	434000	488000	888000	776000	753000	1200000	1050000	1020000
Cit1009	Negative	132	99.9	0.71	133.037	C00049	L-Aspartic acid	Amino acids	8550000	8700000	9120000	12100000	13900000	14300000	8780000	10300000	10500000	24300000	22500000	21800000
Cit1016	Negative	146.1	102.1	0.72	147.053	C00025	L-Glutamic acid	Amino acids	5520000	5140000	5240000	7630000	5960000	6000000	6040000	7050000	6920000	7480000	6330000	7500000
Cit220	Positive	241	119.9	0.77	240.024	C00491	L-(-)-Cystine	Amino acids	4100	8590	8790	6010	4690	6970	6600	7600	8580	6440	4490	7610
Cit247	Positive	132.1	86	1.2	131.095	C00123	L-Leucine	Amino acids	12100000	12700000	12700000	18600000	18300000	17000000	9730000	9210000	8770000	14200000	13300000	13200000
Cit1030	Negative	164.1	147.1	1.97	165.079	C00079	L-Phenylalanine	Amino acids	2970000	3740000	4390000	8300000	7480000	8380000	1380000	1350000	1320000	3990000	3880000	3790000
Cit1035	Negative	118	100.9	0.74	119.058	C00188	L-Threonine	Amino acids	494000	367000	490000	388000	476000	407000	337000	333000	327000	322000	334000	393000
Cit223	Positive	147	83.2	0.68	146.106	C00047	L-(+)-Lysine	Amino acids	3430000	3420000	3930000	3130000	4310000	3620000	2180000	2050000	1600000	3470000	3650000	3440000
Cit221	Positive	182.1	136.1	1.13	181.074	C00082	L-(-)-Tyrosine	Amino acids	11800000	12600000	13500000	12800000	13900000	14200000	9810000	8690000	12200000	8420000	9130000	8890000
Cit1019	Negative	154.1	92.9	0.7	155.07	C00135	L-Histidine	Amino acids	194000	237000	310000	284000	343000	376000	130000	113000	98900	259000	271000	295000
Cit261	Positive	118.1	71.8	0.84	117.079	C00183	L-Valine	Amino acids	7920000	7630000	8710000	9200000	9780000	9870000	9080000	8520000	7200000	10000000	9820000	9190000
Cit245	Positive	132	85.9	1.23	131.095	C00407	L-Isoleucine	Amino acids	25700000	27000000	27100000	31800000	33800000	33300000	21600000	21000000	20100000	27800000	28200000	26900000
Cit1001	Negative	173.1	131.1	0.71	174.112	C00062	L-(+)-Arginine	Amino acids	9010000	9020000	11300000	5830000	9350000	8610000	5090000	5520000	4440000	10300000	10400000	11500000
Cit1022	Negative	118.1	101	0.74	119.058	C00263	L-Homoserine	Amino acids	24900	14500	14900	15300	29300	18200	15200	18100	12200	16800	20500	12500
Cit238	Positive	147.069	83.7	0.68	146.069	C00064	L-Glutamine	Amino acids	8120000	5290000	7310000	7640000	7070000	7070000	5020000	4980000	4840000	8530000	7550000	6820000
Cit229	Positive	133.054	73.9	0.74	132.054	C00152	L-Asparagine	Amino acids	5710000	3840000	3630000	3100000	4360000	4330000	2470000	2380000	2460000	6510000	6090000	5550000
Cit235	Positive	122.02	80.1	0.78	121.02	C00097	L-Cysteine	Amino acids	22000	21900	20400	16000	14900	11200	15200	19600	28600	6430	9360	12700
Cit255	Positive	175	158.1	1.13	174.1	C01047	L-Theanine	Amino acids	21500	8950	16400	24700	34600	24700	22200	17400	14600	13800	11300	10200
Cit258	Positive	138.084	103	1.2	137.084	C00483	L-Tyramine	Amino acids	11500000	14200000	12900000	3420000	6420000	4710000	15200000	14100000	13400000	1710000	2080000	1850000
Cit248	Positive	150	72.8	1.18	149.051	C00073	L-Methionine	Amino acids	269000	246000	237000	367000	480000	386000	227000	203000	241000	590000	508000	552000
Cit227	Positive	90.048	71.8	0.78	89.048	C00041	L-Alanine	Amino acids	155000	111000	194000	167000	207000	218000	176000	206000	260000	328000	327000	278000
Cit257	Positive	205.1	146.1	2.47	204.09	C00078	L-Tryptophan	Amino acids	28200000	31400000	31000000	35300000	35200000	34400000	13800000	12200000	13100000	17000000	16800000	15000000
Cit224	Positive	133	70	0.65	132.16	C00077	L(+)-Ornithine	Amino acids	550000	656000	612000	709000	1170000	937000	319000	293000	260000	1010000	815000	897000
Cit158	Positive	118	88	0.84	117.079	C01826	Dl-Norvaline	Amino acids	7180000	6430000	7510000	7920000	8600000	8700000	7660000	7150000	6350000	8440000	8670000	8190000
Cit242	Positive	269	134	0.81	268.055	C01817	L-Homocystine	Amino acids	14200	13200	11900	12800	5880	6030	13300	13100	27200	5220	3520	3610
Cit430	Positive	225.1	151.4	3.6	224.1	C02794	3-Hydroxykynurenine	Amino acid derivatives	927000	867000	885000	107000	88600	76800	1030000	1070000	1020000	28200	47400	38600
Cit480	Positive	458.1	116.4	0.79	457.1	-	Aspartic acid di-O-glucoside	Amino acid derivatives	8510000	6440000	8100000	5410000	5960000	5800000	12900000	11700000	12300000	9840000	12100000	9900000
Cit592	Positive	235.1	118.4	0.77	234.1	-	Lysine butyrate	Amino acid derivatives	3400	2580	2400	10800	10900	10200	2830	3200	2880	4200	5200	4370
Cit1279	Negative	190.1	84	2.43	191.1	C02712	N-Acetylmethionine	Amino acid derivatives	49000	46000	46900	442000	262000	293000	20000	21600	22500	52300	48000	21900
Cit1215	Negative	245	203.2	3.83	246	C03137	Acetyl tryptophan	Amino acid derivatives	6300000	8000000	6830000	685000	782000	635000	1900000	1950000	2600000	49200	39500	37300
Cit1270	Negative	307	145.2	0.73	308	-	L-Glutamine O-hexside	Amino acid derivatives	32400	29300	37500	67000	48300	81900	24600	18900	17800	74400	54000	40500
Cit1269	Negative	308.1	128.2	0.72	309.1	-	L-Glutamic acid O-glucoside	Amino acid derivatives	84800	77400	86000	59900	81900	54600	112000	92900	107000	105000	101000	115000
Cit954	Negative	611.1	306.2	1.14	612.1	C00127	Glutathione oxidized	Amino acid derivatives	217000	186000	241000	60400	111000	71900	288000	262000	276000	148000	154000	200000
Cit787	Negative	145.1	101	2.63	146.058	-	"2,3-dimethylsuccinic acid"	Amino acid derivatives	76000	84400	75200	112000	137000	139000	54500	54100	59700	81000	73500	84500
Cit1065	Negative	188.1	102	1.16	189.064	C00624	N-Acetyl-L-glutamic acid	Amino acid derivatives	189000	190000	201000	38800	42300	46600	252000	246000	253000	44300	48600	52900
Cit19	Positive	212.2	166.1	1.22	211.084	C07194	"(-)-3-(3,4-Dihydroxyphenyl)-2-methylalanine"	Amino acid derivatives	20400	16300	21900	9	20400	9	27800	12100	18400	17900	10800	24300
Cit391	Positive	251.3	84	1.12	250.062	C00669	γ-Glu-Cys	Amino acid derivatives	76100	70500	74700	77500	52400	61200	71700	83000	64900	88100	77900	99800
Cit5	Positive	118.2	101	0.8	117.079	C00431	5-Aminovaleric acid	Amino acid derivatives	9490	15700	15200	16600	8190	7120	17000	16500	8690	7170	13600	10300
Cit281	Positive	189.2	84	1.02	188.116	C02727	N6-Acetyl-L-lysine	Amino acid derivatives	53700	71400	69200	24200	44900	33300	19500	16500	9	9	9	11300
Cit183	Positive	173.2	116.1	0.79	172.085	-	Glycyl-L-proline	Amino acid derivatives	6330	11100	8910	5140	6920	3260	9750	12500	14500	4200	5870	5260
Cit910	Negative	159.2	88	0.75	160.085	C00993	D-Alanyl-D-Alanine	Amino acid derivatives	6250	8940	5460	6210	5340	5190	2510	3390	4560	4300	4490	2380
Cit872	Negative	279.3	147.1	2.44	280.106	-	Asp-phe	Amino acid derivatives	10300	14700	10700	28000	28400	28100	10800	8270	11200	19500	12900	17700
Cit1083	Negative	187.2	127.1	1.17	188.08	-	Nα-Acetyl-L-glutamine	Amino acid derivatives	670000	615000	639000	230000	507000	300000	785000	764000	785000	411000	515000	481000
Cit1084	Negative	263.1	189	3.78	264.111	C05642	N-γ-Acetyl-N-2-Formyl-5-methoxykynurenamine	Amino acid derivatives	185000	225000	235000	172000	295000	191000	115000	91900	91500	219000	154000	188000
Cit309	Positive	217.1	158.1	1.12	216.122	-	Nα-Acetyl-L-arginine	Amino acid derivatives	17600	30500	32100	17200	30000	20800	22500	17000	9800	15200	18600	14900
Cit308	Positive	132.1	72.8	1.29	131.058	-	N-Propionylglycine	Amino acid derivatives	37800	34000	47400	39700	52800	55400	37200	27500	37800	39400	40500	40500
Cit322	Positive	265.1	130.1	3.15	264.111	C04148	Phenylacetyl-L-glutamine	Amino acid derivatives	9	9	9	9	9	9	28500	18800	28600	9	13100	8250
Cit32	Positive	170.1	124.1	0.72	169.085	C01152	1-Methylhistidine	Amino acid derivatives	40900	41500	60900	42600	37400	44900	72600	71100	93300	146000	116000	126000
Cit299	Positive	189.1	86	1.92	188.116	C02155	N-Glycyl-L-leucine	Amino acid derivatives	40600	46600	47800	32000	21100	29700	52100	65400	80000	18700	17900	21800
Cit278	Positive	247.1	130.1	4.03	246.1	-	N-(3-Indolylacetyl)-L-alanine	Amino acid derivatives	21500	28600	17600	47100	36900	28400	11900	17100	14200	24800	32900	37900
Cit1066	Negative	172.105	130	3.41	173.105	C02710	N-Acetyl-l-leucine	Amino acid derivatives	2190000	2560000	2450000	2630000	2180000	2010000	1770000	1710000	1540000	414000	393000	372000
Cit790	Negative	189.095	128.1	0.77	190.095	C00666	"2,6-Diaminooimelic acid"	Amino acid derivatives	508000	540000	616000	377000	363000	409000	620000	718000	658000	581000	543000	554000
Cit1028	Negative	207.1	144.1	1.95	208.085	C00328	L-Kynurenine	Amino acid derivatives	13700	21500	17200	23100	27900	30300	27900	22100	23900	17700	20200	15900
Cit181	Positive	308	162	1.13	307.084	C00051	Glutathione reduced form	Amino acid derivatives	7970000	8060000	8020000	8640000	6490000	6840000	7870000	7690000	8600000	6170000	6020000	6100000
Cit77	Positive	221.1	114.8	1.58	220.085	C00643	5-Hydroxy-L-tryptophan	Amino acid derivatives	97700	138000	143000	194000	227000	215000	68400	62600	60600	103000	115000	95000
Cit351	Positive	322.4	176.1	1.23	321.1	C11347	S-(methyl)glutathione	Amino acid derivatives	318000	261000	309000	445000	274000	314000	161000	150000	161000	169000	169000	183000
Cit1128	Negative	383	134	1.29	384.122	C00021	S-(5'-Adenosy)-L-homocysteine	Amino acid derivatives	22500	17000	18600	5540	6490	8170	26700	29600	29600	9040	9370	11900
Cit298	Positive	237.1	146.1	2.05	236.08	C02700	N'-Formylkynurenine	Amino acid derivatives	11600	15500	15800	11600	23400	13400	16000	7840	13700	5070	6800	9
Cit765	Negative	128	126	1.15	129.079	C00408	L-Pipecolic acid	Amino acid derivatives	8850	9340	10200	10200	26300	12300	7720	4620	9230	26000	27400	25100
Cit249	Positive	164	61	1.77	163	-	L-Methionine methyl ester	Amino acid derivatives	63000	67400	64500	22700	42800	44700	58900	57800	67600	31900	28300	31900
Cit1032	Negative	275	257.1	0.71	276.132	C00449	L-Saccharopine	Amino acid derivatives	110000	96100	104000	9	31200	23600	96400	77100	77200	40400	48500	33800
Cit62	Positive	170	96	0.67	169.181	-	3-N-Methyl-L-histidine	Amino acid derivatives	8820	7250	13800	15000	14800	13800	12700	15300	14100	27800	23700	26500
Cit1067	Negative	222.1	163	2.61	223.085	-	N-Acetyl-L-tyrosine	Amino acid derivatives	430000	484000	408000	195000	174000	167000	181000	158000	162000	38500	33000	27400
Cit1061	Negative	174	88	1.19	175.048	C01042	N-Acetylaspartate	Amino acid derivatives	89200	82300	125000	10300	41700	40300	100000	111000	102000	55100	60700	48700
Cit773	Negative	217	88	1.14	218.09	C03740	(5-L-Glutamyl)-L-amino acid	Amino acid derivatives	186000	153000	146000	58500	104000	56400	172000	203000	204000	93100	112000	94700
Cit273	Positive	166	149.1	0.65	165.046	-	Methionine sulfoxide	Amino acid derivatives	706000	782000	718000	963000	967000	864000	693000	565000	586000	909000	856000	881000
Cit323	Positive	313.4	120	3.52	312.147	-	Phe-Phe	Amino acid derivatives	12700	11200	10900	13000	7160	6290	19200	19000	19300	6790	4390	2390
Cit350	Positive	399.2	250.1	0.76	398.137	C00019	S-(5'-Adenosyl)-L-methionine	Amino acid derivatives	345000	370000	345000	310000	235000	215000	375000	412000	450000	270000	300000	352000
Cit307	Positive	194.1	135.1	3.38	193.074	C05598	N-Phenylacetylglycine	Amino acid derivatives	126000	108000	142000	187000	161000	162000	66600	61900	68600	165000	188000	181000
Cit835	Negative	162	144.1	0.78	163.129	C03079	4-Hydroxy-L-glutamic acid	Amino acid derivatives	49300	55500	58500	50300	71500	60500	44300	55000	35500	76400	102000	76300
Cit818	Negative	161	56.8	1.4	162.053	C03761	"3-Hydroxy-3-methylpentane-1,5-dioic acid"	Amino acid derivatives	477000	339000	499000	1190000	762000	949000	257000	252000	194000	374000	361000	369000
Cit40	Positive	104	85.9	0.74	103.063	C03665	2-Aminoisobutyric acid	Amino acid derivatives	3260000	3380000	3340000	1370000	1580000	1330000	3720000	3590000	3110000	2320000	2410000	2270000
Cit280	Positive	104	58	0.75	103.063	C01026	"N,N-Dimethylglycine"	Amino acid derivatives	946000	958000	1120000	1730000	1220000	1130000	1210000	1210000	1170000	1780000	1690000	1710000
Cit6	Positive	130	83.9	1.04	129.043	C01879	5-oxoproline	Amino acid derivatives	5690000	6440000	5490000	4270000	5240000	5670000	3290000	2960000	2980000	3890000	3750000	3780000
Cit135	Positive	179	75.9	0.78	178.041	C01419	CYS-GLY	Amino acid derivatives	27900	22300	17500	19700	9920	9050	12700	13000	24700	9120	7460	9540
Cit292	Positive	162	74	1.21	161.069	-	N-Acetylthreonine	Amino acid derivatives	154000	145000	133000	283000	215000	237000	131000	142000	159000	184000	194000	159000
Cit193	Positive	189	144.2	0.68	188.127	C01924	H-HomoArg-OH	Amino acid derivatives	506000	571000	625000	477000	403000	458000	233000	234000	253000	493000	505000	430000
Cit718	Positive	537.1	177.5	2.54	536.1	-	Syringic acid O-feruloyl-O-hexoside	Benzoic acid derivatives	21900	13800	10800	9	9	9	25400	30200	42200	9	9	4310
Cit463	Positive	457.2	191.5	4.51	456.2	-	8-Methyl-2-oxo-4-phenyl-2H-chromen-7-yl 4-(hexyloxy)benzoate	Benzoic acid derivatives	5350000	4810000	5850000	3690000	3360000	2870000	5690000	4590000	6210000	2110000	2120000	2160000
Cit1218	Negative	460.1	118.2	0.74	461.1	-	Anthranilate O-hexosyl-O-hexoside	Benzoic acid derivatives	225000	245000	306000	221000	360000	278000	215000	231000	195000	274000	318000	276000
Cit1183	Negative	315.1	152.1	1.9	316.1	-	"2,5-dihydroxy benzoic acid O-hexside"	Benzoic acid derivatives	1140000	939000	1380000	4480000	4110000	3620000	3720000	3790000	2960000	3930000	4070000	4750000
Cit1256	Negative	331	313.7	2.09	332	-	Gallic acid O-Hexoside	Benzoic acid derivatives	27900	28300	47700	86300	74200	72600	139000	106000	102000	50600	41500	58400
Cit1297	Negative	359.1	197.1	2.34	360.1	-	Syringic acid O-glucoside	Benzoic acid derivatives	125000	90900	85900	404000	342000	287000	162000	178000	177000	360000	261000	222000
Cit54	Positive	138.07	95	0.81	137.071	C02918	3-Carbamyl-1-methylpyridinium (1-Methylnicotinamide)	Pyridine derivatives	3610	4910	5620	9820	6930	7660	3370	2730	3550	7750	7390	9330
Cit72	Positive	184.05	148.1	1.67	183.053	C00847	4-Pyridoxic acid	Pyridine derivatives	126000	132000	144000	132000	113000	114000	174000	161000	185000	78000	73900	65300
Cit929	Negative	181	70.9	0.74	182.079	C00794	D-Sorbitol	Alcohols and polyols	25300	25700	25500	33800	36800	36300	31600	24500	25100	16900	8040	13400
Cit314	Positive	206.13	188.2	2.29	205.131	C05944	Pantothenol	Alcohols and polyols	11600	3130	7490	7310	3870	5880	8420	6320	33900	5650	5920	5360
Cit530	Positive	250	191.3	2.87	250	-	Coumaroyl choline	Cholines	37500	41200	62800	21200	25600	16400	253000	284000	315000	63700	79300	81600
Cit711	Positive	258.2	125.2	0.8	258.2	C00670	sn-Glycero-3-phosphocholine	Cholines	2110000	1510000	2140000	1540000	1390000	1110000	799000	713000	895000	740000	602000	488000
Cit413	Positive	310	251.6	2.96	310	C00933	Sinapoylcholine	Cholines	26400	211000	66600	73300	57300	34600	61300	46200	41400	25200	23200	24800
Cit396	Positive	104.1	60.2	0.74	103.1	C00114	Choline	Cholines	19800000	20300000	19800000	10700000	10900000	9400000	20900000	20200000	18400000	14900000	14900000	14500000
Cit412	Positive	184	83.2	0.78	183	C00588	O-Phosphocholine	Cholines	75600	51700	87000	93500	63600	44600	58200	49300	81200	61800	47400	41800
Cit95	Positive	147.12	88	0.77	146.118	C08201	Acetylcholine	Cholines	14600	13900	17300	9270	16900	13600	8910	12800	4950	9280	10300	10800
Cit1257	Negative	593.1	549.4	3.49	594.1	-	Gallocatechin-catechin	Catechin derivatives	56800	63100	70000	9	9	9	120000	123000	129000	10500	5360	6570
Cit236	Positive	291	139.1	3.27	290.3	C09727	L-Epicatechin	Catechin derivatives	18800	29300	11400	18500	20100	16200	12900	2970	13500	25700	32300	5510
Cit936	Negative	305	125	2.53	306	C12136	Epigallocatechin (EGC)	Catechin derivatives	452000	437000	516000	44600	30900	48500	566000	465000	430000	15500	14800	11300
Cit20	Positive	307	248.1	2.34	306.074	C12127	(+)-Gallocatechin (GC)	Catechin derivatives	42800	22200	16600	9	9	9	43000	36700	41700	9	9	9
Cit331	Positive	139.1	93	3.01	138.032	C16700	Protocatechuic aldehyde	Catechin derivatives	47900	42000	71700	7620	15400	19600	119000	135000	134000	17600	14500	24000
Cit642	Positive	308.196	220.5	1.28	307.196	-	N-Caffeoylspermidine	Phenolamides	9	9	9	90500	20500	44000	6120	7620	9	12600	8360	19300
Cit632	Positive	558.282	264.8	3.59	557.282	-	"N', N''-disinapoylspermidine"	Phenolamides	66100	45300	73000	11100	6050	8870	61800	68200	100000	9210	5600	4700
Cit652	Positive	397.1	147.4	1.69	396.1	-	N-hexosyl-p-coumaroyl putrescine	Phenolamides	71000	52100	76900	9	9	9	15800	14300	14500	9	9	9
Cit661	Positive	235.1	147.5	2.27	234.1	C18326	N-p-Coumaroyl putrescine	Phenolamides	5210000	4130000	4740000	54400	48700	99800	4350000	4150000	4330000	10100	15200	17000
Cit634	Positive	584.2	325.8	2.49	583.2	-	"N',N"",N""'-p-coumaroyl-cinnamoyl-caffeoyl spermidine"	Phenolamides	8150	11600	11600	9	2080	2840	11600	9820	12100	9	9	9
Cit658	Positive	277.2	260.8	2.55	276.2	-	N'-p-Coumaroyl agmatine	Phenolamides	242000	184000	192000	9	9	9	236000	244000	258000	9	9	9
Cit668	Positive	295	207.6	2.7	294	-	N-Sinapoyl putrescine	Phenolamides	159000	163000	171000	39600	43500	61300	281000	245000	310000	51000	49200	47100
Cit644	Positive	307.2	177.5	2.71	306.2	C18325	N-Feruloyl agmatine	Phenolamides	32400	30200	20100	13200	25800	13100	43400	43500	56400	13200	17300	38600
Cit394	Positive	131.1	72.1	0.64	130.1	C00179	Agmatine	Phenolamides	1230000	1070000	1380000	662000	656000	503000	1450000	1390000	1110000	402000	319000	328000
Cit660	Positive	235.1	147.4	2.27	234.1	-	N'-p-Coumaroyl putrescine	Phenolamides	4890000	4430000	4980000	54200	49200	113000	4410000	4080000	4320000	10100	20800	20600
Cit659	Positive	277.1	147.5	2.56	276.1	C04498	N-p-Coumaroyl agmatine	Phenolamides	22700	19200	27800	9	9	9	26700	27400	34800	9	9	9
Cit650	Positive	314	177.5	4.87	313	C02717	N-Feruloyl tyramine	Phenolamides	14100	13400	7720	9	9	9	61900	61900	62400	9	9	9
Cit645	Positive	265.1	177.5	2.44	264.1	-	N'-Feruloyl putrescine	Phenolamides	642000	410000	352000	13500	11300	14000	599000	481000	677000	2650	3200	4300
Cit646	Positive	265.1	177.5	2.44	264.1	C10497	N-Feruloyl putrescine	Phenolamides	2380000	1630000	1400000	30100	39700	51500	2210000	1960000	2640000	18000	9710	11700
Cit362	Positive	203	112	0.6	202	C00750	Spermine	Phenolamides	8020000	8520000	7870000	11000000	11100000	10500000	6940000	7040000	7420000	10700000	11300000	10200000
Cit28	Positive	103	86.1	0.62	102.116	C01672	"1,5-Diaminopentane"	Phenolamides	18400	17200	18000	29300	16900	24100	18600	19800	17300	16700	18300	17700
Cit335	Positive	89	71.9	0.64	88.1	C00134	Putrescine	Phenolamides	21600000	20900000	29600000	11000000	18400000	13100000	15800000	13200000	13800000	6190000	5170000	4110000
Cit291	Positive	131	71.9	0.72	130.111	C02714	N-Acetylputrescine	Phenolamides	1380000	1220000	1560000	642000	742000	572000	1650000	1530000	1260000	465000	379000	393000
Cit636	Positive	298.1	166.5	1.14	297.1	-	N2-methylguanosine	Nucleotide and its derivates	42800	45100	43600	33000	24200	30900	111000	97100	127000	21300	33900	31900
Cit417	Positive	153	136.4	1.16	152	C00385	Xanthine	Nucleotide and its derivates	39700	32800	32800	103000	100000	96200	31000	28000	29400	68500	66100	56100
Cit467	Positive	348.1	136.4	0.85	347.1	C01367	Adenosine 3'-monophosphate	Nucleotide and its derivates	450000	356000	335000	406000	279000	290000	179000	213000	128000	147000	155000	187000
Cit411	Positive	664.2	524.1	1.14	663.2	C00003	Nicotinic acid adenine dinucleotide	Nucleotide and its derivates	698000	622000	648000	163000	367000	257000	850000	818000	796000	415000	450000	498000
Cit399	Positive	349.1	137.4	1.13	348.1	C00130	Inosine 5'-monophosphate	Nucleotide and its derivates	33500	37100	23500	17300	29000	30000	15600	11800	14700	14000	21800	13400
Cit573	Positive	366.2	203.5	0.81	365.2	-	iP7G	Nucleotide and its derivates	28300	56400	60800	36400	53100	24700	83600	93100	73800	49500	46000	46100
Cit393	Positive	348.2	136.4	1.14	347.2	C00020	Adenosine 5'-monophosphate	Nucleotide and its derivates	475000	466000	439000	493000	430000	497000	233000	234000	197000	246000	321000	306000
Cit902	Negative	328.1	134.2	1.84	329.1	C00575	Cyclic AMP	Nucleotide and its derivates	30600	41200	45600	21700	20000	21900	31200	24500	27300	9830	9150	9940
Cit1315	Negative	565.1	323.3	1.12	566.1	C00029	Uridine 5'-diphospho-D-glucose	Nucleotide and its derivates	5630000	4670000	4900000	2800000	3530000	3660000	5570000	5700000	5900000	3970000	3940000	3790000
Cit427	Positive	333.052	137	0.67	332.052	C06196	2'-Deoxyinosine-5'-monophosphate	Nucleotide and its derivates	1980000	1230000	1670000	201000	338000	316000	5200000	6330000	6190000	598000	687000	652000
Cit454	Positive	167.1	121	1.96	166.1	C16614	6-Methylmercaptopurine	Nucleotide and its derivates	5980000	7250000	7190000	11100000	10300000	10400000	2620000	2410000	2990000	4530000	4870000	4930000
Cit468	Positive	400.2	136.1	2.05	399.2	-	Adenosine O-ribose	Nucleotide and its derivates	71300	52100	58600	34600	31000	24000	77700	61300	60600	17800	20400	14700
Cit713	Positive	384.115	252.2	2.19	383.115	-	Succinyladenosine	Nucleotide and its derivates	838000	1200000	1160000	775000	685000	600000	1150000	1050000	854000	360000	385000	348000
Cit860	Negative	266	134.2	1.88	267	C00212	Adenosine	Nucleotide and its derivates	398000	521000	528000	306000	314000	263000	405000	385000	341000	132000	135000	119000
Cit334	Positive	121	121	1.42	120.044	C15587	Purine	Nucleotide and its derivates	105000	136000	105000	9	6350	5440	121000	119000	105000	9	9	9
Cit138	Positive	112	95	0.75	111.043	C00380	Cytosine	Nucleotide and its derivates	82100	73400	101000	133000	68500	89100	39900	36400	27500	14700	22600	19600
Cit96	Positive	136.1	136.1	1.12	135.054	C00147	Adenine	Nucleotide and its derivates	389000	605000	616000	165000	204000	191000	462000	388000	382000	103000	117000	110000
Cit79	Positive	126.1	126.1	1.13	125.059	C02376	5-Methylcytosine	Nucleotide and its derivates	23800	23200	25200	24800	14000	15800	15400	12800	13900	6300	9	5940
Cit388	Positive	335.1	122.8	0.79	334.057	C00455	β-Nicotinamide mononucleotide	Nucleotide and its derivates	274000	171000	310000	58600	68400	45000	354000	351000	399000	73400	82900	88100
Cit45	Positive	152.1	135.1	0.85	151.049	-	2-Hydroxy-6-aminopurine	Nucleotide and its derivates	31400	24100	37500	33100	23700	9700	33400	19400	33100	9130	16300	21300
Cit378	Positive	113.027	95.9	1.19	112.027	C00106	Uracil	Nucleotide and its derivates	242000	206000	258000	133000	147000	114000	265000	251000	232000	104000	128000	98100
Cit370	Positive	243.09	127.1	2.08	242.09	C00214	Thymidine	Nucleotide and its derivates	31300	31700	26200	13900	11900	15700	33600	27700	32900	12600	12500	16200
Cit1152	Negative	243.1	110	1.19	244.07	C00299	Uridine	Nucleotide and its derivates	330000	346000	321000	55900	194000	101000	438000	341000	406000	116000	160000	142000
Cit185	Positive	152	135.1	1.15	151.049	C00242	Guanine	Nucleotide and its derivates	13400	16300	14800	137000	6630	9920	22400	22400	25500	9350	12700	13400
Cit202	Positive	269.1	137	0.8	268.081	C00294	Inosine	Nucleotide and its derivates	197000	179000	167000	42300	43500	36400	196000	160000	176000	52800	54100	61900
Cit962	Negative	282.092	150.1	1.47	283.092	C00387	Guanosine	Nucleotide and its derivates	582000	723000	730000	389000	638000	480000	720000	634000	648000	372000	458000	412000
Cit149	Positive	268.097	151.7	1.68	267.097	C00330	Deoxyguanosine	Nucleotide and its derivates	15200	28000	21500	37300	22200	16300	25100	19600	31600	11500	14000	11200
Cit1160	Negative	283	151.1	1.77	284.076	C01762	Xanthosine	Nucleotide and its derivates	580000	630000	793000	460000	562000	463000	517000	504000	529000	621000	587000	630000
Cit94	Positive	300.1	168.1	1.48	299.087	-	8-Hydroxyguanosine	Nucleotide and its derivates	86800	99000	123000	52600	41400	37000	173000	139000	184000	39700	43500	37600
Cit42	Positive	308	112	1.25	307.057	C00239	2'-Deoxycytidine-5'-monophosphate	Nucleotide and its derivates	16700	18600	15300	14600	12100	12000	17700	16900	16900	8880	11600	11200
Cit75	Positive	298	135.1	2.85	297.09	C00170	5'-Deoxy-5'-(methylthio)adenosine	Nucleotide and its derivates	2570000	3120000	3240000	2530000	1940000	1910000	4270000	3720000	4370000	2200000	2440000	2110000
Cit945	Negative	784.2	437.2	2.78	785.157	C00016	Flavin adenine dinucleotide (FAD)	Nucleotide and its derivates	615000	568000	597000	274000	257000	260000	570000	549000	459000	199000	197000	191000
Cit1153	Negative	403	159	0.68	404.161	C00015	Uridine 5’-diphosphate	Nucleotide and its derivates	75700	77100	95900	94400	132000	116000	93900	84400	63800	101000	130000	112000
Cit29	Positive	150	133.1	1.03	149.07	C02216	1-Methyladenine	Nucleotide and its derivates	64300	55700	68500	14100	16100	13800	61400	70800	62900	12900	13100	13600
Cit914	Negative	213	78.9	1.23	214.016	-	Deoxyribose 5-phosphate	Nucleotide and its derivates	1070000	745000	784000	182000	134000	164000	111000	61200	101000	13900	11800	9110
Cit904	Negative	322	78.8	0.82	323.052	C00055	Cytidine 5'-monophosphate (Cytidylic acid)	Nucleotide and its derivates	18000	20100	18400	18900	12800	6430	6260	7440	4970	9030	18400	14600
Cit41	Positive	332	136.1	1.14	331.068	C00360	2'-Deoxyadenosine-5'-monophosphate	Nucleotide and its derivates	308000	331000	322000	158000	214000	186000	291000	287000	272000	177000	175000	160000
Cit1154	Negative	323	78.8	1.23	324.036	C00105	Uridine 5'-monophosphate	Nucleotide and its derivates	75500	59400	56300	49900	49100	46300	51700	39300	46700	28800	43900	38500
Cit1060	Negative	382	134.1	2.17	383.108	-	N6-Succinyl Adenosine	Nucleotide and its derivates	363000	510000	532000	319000	292000	287000	428000	416000	411000	194000	189000	164000
Cit136	Positive	244.086	111.4	0.82	243.086	C00475	Cytidine	Nucleotide and its derivates	379000	506000	495000	812000	360000	520000	204000	202000	284000	75700	56300	53500
Cit147	Positive	252	136.1	1.96	251.102	C00559	Deoxyadenosine	Nucleotide and its derivates	47500	53100	48500	88900	40500	26900	50800	49800	61600	25100	25800	23800
Cit35	Positive	312	180.1	2.23	311.123	-	2-(dimethylamino)guanosine	Nucleotide and its derivates	20400	27300	26500	31000	13000	24400	38200	40000	51200	21800	25500	19500
Cit1162	Negative	243	153.1	1.2	244.07	C02067	β-Pseudouridine	Nucleotide and its derivates	59400	70800	60700	8230	28800	20200	95800	60300	80300	32500	38200	38400
Cit198	Positive	269.08	137.1	1.44	268.081	-	Hypoxanthine-9-β-D-arabinofuranoside	Nucleotide and its derivates	151000	189000	337000	31500	54800	30500	270000	290000	293000	17800	24900	19100
Cit706	Positive	477.1	315.6	3.31	477.1	-	Rosinidin O-hexoside	Anthocyanins	65800	64400	66200	18600	20400	18400	56400	54700	70400	9	9	9
Cit688	Positive	301.1	273.6	3.98	301.1	C08726	Peonidin	Anthocyanins	144000	126000	160000	11400	10100	10200	310000	322000	169000	12100	13200	11400
Cit1246	Negative	465.1	285.3	2.5	466.1	-	Cyanidin O-syringic acid	Anthocyanins	53400	60000	71900	15700	17600	19600	75000	72000	61500	8550	9040	13900
Cit1287	Negative	473.1	269.3	3.11	474.1	-	Pelargonidin O-acetylhexoside	Anthocyanins	9	9	8210	9	9	9	13700	13000	11400	9	9	9
Cit145	Positive	465.1	303.1	2.38	465.1	C12138	Delphinidin 3-O-glucoside (Mirtillin)	Anthocyanins	391000	261000	314000	9	9	9	69100	41400	59100	9	9	9
Cit133	Positive	595	287.9	2.62	595	C08620	Cyanidin 3-O-rutinoside (Keracyanin)	Anthocyanins	50500	23700	42900	9	9	9	154000	150000	146000	9	9	9
Cit707	Positive	479.118	302.8	3.54	478.118	-	Selgin 5-O-hexoside	Flavone	7540000	10800000	9870000	1740000	2020000	1780000	7360000	6510000	7870000	1410000	1310000	1330000
Cit677	Positive	477.14	315.5	5.27	476.14	-	O-methylChrysoeriol 5-O-hexoside	Flavone	8280	21000	18400	13000	9900	9260	16700	20000	16600	3140	3390	2410
Cit748	Positive	565.3	564.8	4.16	564.3	-	Tricin O-oxalylhexoside	Flavone	59800	61400	54900	119000	122000	113000	52900	44500	52600	101000	64500	88400
Cit709	Positive	565	317.8	4.32	564	-	Selgin O-malonylhexoside	Flavone	16400000	13000000	16400000	2260000	2010000	874000	15900000	14800000	14100000	321000	202000	107000
Cit751	Positive	725.2	331.7	4.38	724.2	-	Tricin O-rhamnosyl-O-malonylhexoside	Flavone	13300	12500	9120	9	9	9	11400	8300	10200	9	9	9
Cit719	Positive	551	347.4	4.52	550	-	Tricetin O-malonylhexoside	Flavone	83200	73400	54300	9	9	9	68900	60100	71300	9	9	9
Cit511	Positive	503	255.6	5.23	502	-	Chrysin O-malonylhexoside	Flavone	23500	23600	24000	52600	79700	101000	17000	15600	11600	41800	40100	27700
Cit510	Positive	417.2	255.8	4.96	416.2	-	Chrysin O-hexoside	Flavone	23300	16600	34900	55900	44100	50900	42200	43500	47200	28500	29800	31700
Cit581	Positive	509.3	347.9	3.46	508.3	-	Limocitrin O-hexoside	Flavone	2470000	2560000	2470000	81100	79300	80800	224000	155000	155000	9	9	9
Cit1316	Negative	313.08	298.3	7.23	314.08	-	Velutin	Flavone	30300	36000	38200	9	9	9	55100	49800	46700	9	9	9
Cit678	Positive	477.2	328	5.27	476.2	-	O-methylChrysoeriol 7-O-hexoside	Flavone	16500	28200	21600	8260	11500	9370	22700	24000	23300	3060	4630	3150
Cit708	Positive	641.1	479.5	4.23	640.1	-	Selgin O-hexosyl-O-hexoside	Flavone	54100	38900	57000	33900	34300	30200	22000	31200	33600	17200	8230	14000
Cit590	Positive	581.2	287.3	3.71	580.2	-	Luteolin O-hexosyl-O-pentoside	Flavone	6340000	6400000	7020000	8820000	10700000	10500000	9540000	10900000	10600000	8910000	10400000	10300000
Cit716	Positive	509.2	347.6	4.01	508.2	-	Syringetin 5-O-hexoside	Flavone	2570000	2440000	2670000	70600	74300	76300	355000	335000	335000	9	9	9
Cit591	Positive	655	287.7	4.59	654	-	Luteolin O-sinapoylhexoside	Flavone	660000	765000	1280000	9	9	9	1610000	1540000	1810000	9	9	9
Cit526	Positive	669	301.6	4.82	668	-	Chrysoeriol O-sinapoylhexoside	Flavone	376000	640000	932000	9	9	9	938000	749000	796000	9	9	9
Cit508	Positive	417.1	255.7	4.95	416.1	-	Chrysin 5-O-glucoside (Toringin)	Flavone	32700	30600	40100	54600	47900	45300	35800	46500	49300	27800	36600	31000
Cit582	Positive	611.1	449.4	3.38	610.1	-	"Luteolin 3',7-di-O-glucoside"	Flavone	137000	122000	189000	17500	10200	13600	187000	180000	181000	12400	16500	20400
Cit466	Positive	461.1	257.4	3.75	460.1	-	Acacetin O-glucuronic acid	Flavone	98700	86000	47400	89500	121000	90500	99300	104000	107000	79300	88500	150000
Cit524	Positive	771.1	463.2	3.76	770.1	-	Chrysoeriol O-hexosyl-O-rutinoside	Flavone	136000	99700	91700	14700	12400	17900	188000	178000	144000	16600	12000	19300
Cit717	Positive	509.3	283.6	4.1	508.3	-	Syringetin 7-O-hexoside	Flavone	2230000	2160000	2170000	60500	94600	66500	336000	312000	328000	9	9	9
Cit395	Positive	433.1	271.7	4.15	432.1	C04608	Apigenin 7-O-glucoside (Cosmosiin)	Flavone	553000	550000	409000	1140000	1100000	925000	994000	883000	744000	883000	692000	701000
Cit525	Positive	549.1	301.7	4.52	548.1	-	Chrysoeriol O-malonylhexoside	Flavone	113000	124000	149000	2980	3870	8730	207000	189000	182000	3520	3560	3160
Cit732	Positive	655.2	331.7	3.21	654.2	-	Tricin 5-O-hexosyl-O-hexoside	Flavone	34700	46900	35200	9	9	9	38700	46000	49000	9	9	9
Cit738	Positive	655.2	331.7	3.45	654.2	-	Tricin 7-O-hexosyl-O-hexoside	Flavone	83200	93200	71300	9	9	9	90500	97100	91400	9	9	9
Cit747	Positive	579.1	331.7	4.5	578.1	-	Tricin O-malonylhexoside	Flavone	568000	664000	864000	9	9	9	724000	661000	634000	9	9	9
Cit733	Positive	639.1	331.8	4.02	638.1	-	Tricin 5-O-rutinoside	Flavone	301000	285000	354000	9	9	9	395000	374000	412000	9	9	9
Cit737	Positive	493.1	331.8	4.24	492.1	-	Tricin 7-O-hexoside	Flavone	1640000	2730000	3060000	56800	62200	58000	7280000	6180000	6070000	42100	39400	32800
Cit752	Positive	699.2	331.6	4.83	698.2	-	Tricin O-sinapoylhexoside	Flavone	228000	356000	702000	9	9	9	602000	686000	450000	9	9	9
Cit1173	Negative	329	314.2	5.68	330	-	Tricin	Flavone	526000	447000	757000	9	1350	9	1300000	1260000	1130000	9	9	9
Cit1220	Negative	563.1	269.3	3.93	564.1	-	Apigenin O-hexosyl-O-pentoside	Flavone	19100	25700	25500	24200	44400	21900	37900	44600	40900	32200	19800	29600
Cit1216	Negative	491.1	287.3	5.16	492.1	-	Acetyl-eriodictyol O-hexoside	Flavone	75900	79500	103000	26800	36400	33600	144000	174000	151000	17200	27000	31100
Cit1213	Negative	487.1	283.2	2.57	488.1	-	Acacetin O-acetyl hexoside	Flavone	66700	67000	70900	28300	33100	34300	84500	58000	59500	41000	40000	46400
Cit1221	Negative	739.1	269.3	3.72	740.1	-	Apigenin O-hexosyl-O-rutinoside	Flavone	1210000	1000000	869000	624000	479000	579000	1370000	1420000	1470000	541000	483000	565000
Cit1317	Negative	489.1	313.2	3.75	490.1	-	Velutin O-glucuronic acid	Flavone	9	9	9	8560	7050	9940	7520	10400	9	21300	8450	19600
Cit1227	Negative	461.1	285.2	3.8	462.1	-	Chrysoeriol 5-O-hexoside	Flavone	162000	330000	329000	12600	7870	20800	789000	837000	655000	16800	16300	10600
Cit1235	Negative	503.1	341.3	3.94	504.1	-	Chrysoeriol O-acetylhexoside	Flavone	112000	55600	95700	9	9	9	114000	94900	104000	9	9	9
Cit1230	Negative	607.1	299.1	3.99	608.1	-	Chrysoeriol 7-O-rutinoside	Flavone	1370000	1570000	1540000	148000	128000	194000	2200000	2380000	2240000	224000	202000	241000
Cit1242	Negative	621.1	299.4	4.08	622.1	-	Chrysoeriol O-rhamnosyl-O-glucuronic acid	Flavone	75100	34800	37300	9	9	9	17400	12700	17900	9	9	9
Cit1229	Negative	461.1	460.9	4.23	462.1	-	Chrysoeriol 7-O-hexoside	Flavone	154000	320000	329000	8350	10700	9430	952000	817000	669000	19100	9850	10700
Cit1313	Negative	521.1	329.3	3.74	522.1	-	Tricin O-saccharic acid	Flavone	142000	139000	152000	1050000	986000	1050000	217000	233000	235000	1450000	1240000	890000
Cit1303	Negative	491.1	329.3	3.94	492.1	-	Tricin 5-O-hexoside	Flavone	121000	151000	120000	76300	67200	72700	111000	120000	91500	49500	56200	52700
Cit1306	Negative	653.1	593.4	4.08	654.1	-	Tricin di-O-hexoside	Flavone	38300	41700	31700	27700	31400	38600	46100	35700	24600	37700	36200	39000
Cit259	Positive	287.1	287.1	5	286.1	C01514	Luteolin	Flavone	12200000	13400000	16400000	23000000	25600000	24900000	23600000	23300000	23700000	26000000	26300000	25700000
Cit105	Positive	579.164	271.1	4.02	578.164	C12627	Apigenin 7-O-neohesperidoside (Rhoifolin)	Flavone	23500000	22300000	23300000	29700000	30200000	28900000	29400000	30200000	27100000	27500000	28600000	27400000
Cit104	Positive	433.106	313.1	3.75	432.106	-	Apigenin 5-O-glucoside	Flavone	661000	646000	516000	1380000	1420000	1290000	1250000	1040000	1250000	1010000	835000	897000
Cit759	Negative	299.063	284	5.71	300.063	C04293	Chrysoeriol	Flavone	677000	598000	1050000	4720	6700	9	2180000	2830000	1820000	8910	7040	9
Cit106	Positive	579.164	271.1	3.96	578.164	-	Apigenin 7-rutinoside (Isorhoifolin)	Flavone	23200000	22100000	22800000	29000000	28500000	28400000	28800000	29800000	26900000	27600000	28200000	26800000
Cit305	Positive	403.132	373.1	7.02	402.132	C10112	Nobiletin	Flavone	2440000	1970000	1560000	1110000	1900000	1100000	764000	636000	861000	343000	605000	660000
Cit857	Negative	283.069	268	6.98	284.069	C01470	Acacetin	Flavone	88000	101000	64800	58000	79100	38400	299000	385000	244000	68300	70100	44000
Cit367	Positive	373.121	373.1	7.5	372.121	C10190	Tangeretin	Flavone	2790000	2430000	2350000	1430000	2530000	1540000	758000	665000	770000	359000	632000	547000
Cit1040	Negative	447.3	285.1	3.79	448.101	-	Luteolin 7-O-glucoside (Cynaroside)	Flavone	30000	53700	127000	9	9	9	671000	630000	532000	9	9	9
Cit375	Positive	303	301.5	4.49	302.043	C10192	Tricetin	Flavone	14300	14000	15000	4820	4060	2590	23200	9	23000	9	3780	3710
Cit9	Positive	273.07	153.1	5.6	272.069	C09614	Butin	Flavone	7380	9040	4240	9	4960	9	9770	5980	9330	3520	9	9
Cit420	Positive	479	317.3	3.84	478	-	methylQuercetin O-hexoside	Flavonol	4300000	6240000	6720000	451000	404000	352000	4040000	4100000	4170000	140000	120000	148000
Cit578	Positive	301.1	259.1	3.98	300.1	C10098	Kaempferide	Flavonol	111000	115000	158000	8240	8290	8570	139000	123000	137000	6110	12400	3080
Cit577	Positive	479.2	318	4.11	478.2	-	Isorhamnetin O-hexoside	Flavonol	149000	118000	104000	27300	31700	23700	136000	148000	184000	9	9	9
Cit715	Positive	509.1	347.7	3.36	508.1	-	Syringetin 3-O-hexoside	Flavonol	2390000	2410000	2470000	133000	68900	86500	178000	186000	225000	9	9	9
Cit575	Positive	479.2	317.8	4	478.2	-	Isorhamnetin 5-O-hexoside	Flavonol	5570000	8150000	7190000	1090000	1010000	869000	4890000	4940000	5860000	616000	612000	667000
Cit701	Positive	713.1	713.1	2.93	712.1	-	Quercetin 5-O-malonylhexosyl-hexoside	Flavonol	26300	15300	37600	9	9	9	15800	13800	9960	9	9	9
Cit1265	Negative	519.1	315.3	4.28	520.1	-	Isorhamnetin O-acetyl-hexoside	Flavonol	10000000	6260000	10100000	1900000	1600000	742000	8030000	8270000	7350000	231000	158000	85300
Cit1290	Negative	505.1	301.2	3.91	506.1	-	Quercetin O-acetylhexoside	Flavonol	625000	242000	448000	19600	11600	10000	471000	398000	298000	7200	7330	9820
Cit1249	Negative	329.1	314.3	5.86	330.1	-	Di-O-methylquercetin	Flavonol	60100	73500	68700	43100	34200	32700	47900	43800	50400	28700	33900	34200
Cit1119	Negative	609.153	609.1	3.62	610.153	C05625	Quercetin 3-O-rutinoside (Rutin)	Flavonol	182000	470000	463000	12000	10600	8790	284000	280000	227000	12300	10100	6950
Cit993	Negative	593.159	285.1	3.79	594.159	-	Kaempferol 3-O-rutinoside (Nicotiflorin)	Flavonol	167000	231000	170000	9	9	9	341000	314000	500000	27100	18800	18000
Cit218	Positive	315.079	300	7.17	314.079	-	Kumatakenin	Flavonol	35100	29800	30200	9	2790	1490	30900	27500	25400	9	9	9
Cit216	Positive	433.106	287	4.9	432.106	-	Kaempferol 7-O-rhamnoside	Flavonol	120000	135000	163000	372000	472000	439000	449000	377000	449000	428000	483000	525000
Cit153	Positive	305.058	153	4.08	304.058	C01617	Dihydroquercetin (Taxifolin)	Flavonol	11200	9	11100	27100	32400	21900	14700	12500	15100	20500	37100	36600
Cit985	Negative	623.169	314	3.75	624.169	-	Isorhamnetin 3-O-neohesperidoside	Flavonol	654000	1350000	1410000	121000	95200	74300	723000	686000	624000	39900	28900	23600
Cit1057	Negative	463.096	300	3.78	464.096	C10108	Myricetin 3-O-rhamnoside (Myricitrin)	Flavonol	75100	59000	191000	57200	20200	26100	15000	4950	11000	29700	46700	12500
Cit984	Negative	315.058	300.1	5.81	316.058	C10084	Isorhamnetin	Flavonol	36600	17000	13300	9	9	9	68100	102000	59700	9	9	9
Cit992	Negative	593.159	285.1	3.66	594.159	-	Kaempferol 3-O-robinobioside (Biorobin)	Flavonol	177000	260000	195000	9	9	9	323000	297000	379000	9	9	9
Cit764	Negative	447.101	287.1	4.03	448.101	C12249	Kaempferol 3-O-glucoside (Astragalin)	Flavonol	19600	33200	55500	9	9	9	92700	74000	68400	9	9	9
Cit990	Negative	577.5	431	3.77	578.164	C16981	"Kaempferol 3,7-dirhamnoside (Kaempferitrin)"	Flavonol	16500	21900	29800	9	9	9	25000	21300	21400	9	9	9
Cit152	Positive	321.05	153.1	3.53	320.053	C02906	Dihydromyricetin	Flavonol	148000	146000	117000	89600	83300	109000	133000	87000	96800	28300	34200	26000
Cit1120	Negative	463	301	3.8	464.096	-	Quercetin 4'-O-glucoside (Spiraeoside)	Flavonol	437000	359000	422000	692000	672000	633000	516000	547000	486000	639000	578000	539000
Cit1118	Negative	463	301.1	3.81	464.096	C05623	Quercetin 3-O-glucoside (Isotrifoliin)	Flavonol	976000	454000	456000	90200	43100	72600	949000	760000	652000	60700	45700	19900
Cit763	Negative	447	284	3.99	448.101	C12626	Kaempferol 3-O-galactoside (Trifolin)	Flavonol	38800	46400	92700	9	9	9	445000	439000	387000	9	9	9
Cit213	Positive	433	287	4.45	432.106	C16911	Kaempferol 3-O-rhamnoside (Kaempferin)	Flavonol	57400	54500	69200	73500	80900	75300	94000	82800	128000	71900	80300	77000
Cit1124	Negative	315	165.1	6.19	316.058	C10176?	Rhamnetin (7-O-methxyl quercetin)	Flavonol	6950	9	9	9	82.3	9	7300	14300	27900	9	9	9
Cit176	Positive	289	215.1	3.66	288.063	C01378	Fustin	Flavonol	9	9	9	112000	86200	53400	9	9	9	9	9	9
Cit1142	Negative	345	330.2	5.59	346.069	C11620	Syringetin	Flavonol	52000	19400	28400	9	7110	9	118000	107000	86600	9	9	9
Cit217	Positive	741.22	433.2	3.31	740.216	C10178	Kaempferol-3-O-robinoside-7-O-rhamnoside (Robinin)	Flavonol	968000	822000	981000	1240000	983000	910000	1110000	1130000	970000	1220000	1080000	1130000
Cit1299	Negative	657.1	495.3	4.51	658.1	-	Tricin 4'-O-(syringyl alcohol) ether 5-O-hexoside	Flavonolignan	29500	38800	44700	62700	48100	58500	49200	66200	54000	40200	50900	49800
Cit638	Positive	435.1	339.7	3.74	434.1	-	Naringenin C-hexoside	Flavone C-glycosides	108000	132000	111000	82400	94000	86900	199000	169000	209000	127000	124000	108000
Cit533	Positive	565.155	499.3	3.67	564.155	-	C-pentosyl-C-hexosyl-apigenin	Flavone C-glycosides	449000	382000	438000	760000	867000	592000	974000	940000	711000	774000	822000	646000
Cit474	Positive	433.113	271.7	3.73	432.113	-	Apigenin C-glucoside	Flavone C-glycosides	163000	126000	155000	214000	236000	153000	379000	401000	353000	156000	136000	140000
Cit465	Positive	447.1	298	3.72	446.1	-	Acacetin C-hexoside	Flavone C-glycosides	65200	47500	45700	108000	94100	64500	172000	120000	194000	56800	66700	95500
Cit680	Positive	419.1	383.9	3.81	418.1	-	O-methylnaringenin C-pentoside	Flavone C-glycosides	35000	126000	83800	114000	159000	123000	204000	110000	109000	90200	163000	164000
Cit509	Positive	417.2	381.9	3.98	416.2	-	Chrysin C-hexoside	Flavone C-glycosides	107000	102000	122000	363000	394000	228000	272000	302000	315000	258000	201000	226000
Cit583	Positive	449.1	300	3.47	448.1	-	Luteolin 6-C-glucoside	Flavone C-glycosides	3840000	4550000	5790000	81300	90600	96900	7790000	8980000	11000000	232000	227000	122000
Cit489	Positive	757.3	450.1	3.47	756.3	-	C-hexosyl-apigenin O-hexosyl-O-hexoside	Flavone C-glycosides	342000	349000	353000	124000	109000	122000	499000	445000	488000	125000	158000	215000
Cit460	Positive	627.1	430	2.76	626.1	-	8-C-hexosyl-hesperetin O-hexoside	Flavone C-glycosides	72400	114000	88500	48600	45100	33700	101000	103000	105000	36200	39700	41600
Cit514	Positive	787.1	344.1	2.78	786.1	-	Chrysoeriol 6-C-hexoside 8-C-hexoside-O-hexoside	Flavone C-glycosides	111000	92600	101000	49400	34900	36900	677000	622000	457000	33700	25500	21900
Cit502	Positive	611.2	412.3	2.89	610.2	-	C-hexosyl-luteolin O-hexoside	Flavone C-glycosides	2520000	4040000	4200000	94000	108000	104000	7600000	6090000	7650000	177000	177000	153000
Cit445	Positive	625.2	398.1	2.95	624.2	-	6-C-hexosyl chrysoeriol O-hexoside	Flavone C-glycosides	92900	63900	80300	15300	25100	14800	228000	242000	301000	9940	14400	11100
Cit452	Positive	611.1	329	3.05	610.1	-	6-C-hexosyl-luteolin O-hexoside	Flavone C-glycosides	22900	13800	22900	9	9	9	62500	52300	58800	9	9	9
Cit513	Positive	463.1	379.6	3.06	462.1	-	Chrysoeriol 6-C-hexoside	Flavone C-glycosides	24400	37600	37600	9	9	9	70400	81600	109000	9	9	9
Cit498	Positive	581.1	467.9	3.14	580.1	-	C-hexosyl-luteolin C-pentoside	Flavone C-glycosides	212000	147000	205000	148000	187000	184000	232000	230000	274000	136000	181000	171000
Cit446	Positive	581.1	335.9	3.25	580.1	-	6-C-hexosyl luteolin O-pentoside	Flavone C-glycosides	748000	732000	868000	1100000	1280000	1150000	1820000	1820000	1850000	1270000	1290000	1170000
Cit457	Positive	757.2	757	3.05	756.2	-	8-C-hexosyl-apigenin O-hexosyl-O-hexoside	Flavone C-glycosides	261000	287000	363000	134000	102000	121000	447000	457000	396000	142000	133000	119000
Cit451	Positive	627.1	447.3	3.37	626.1	-	6-C-hexosyl-hesperetin O-hexoside	Flavone C-glycosides	266000	297000	421000	9	9	9	303000	240000	325000	9	17800	26300
Cit462	Positive	581.1	449.2	3.38	580.1	-	8-C-hexosyl-luteolin O-pentoside	Flavone C-glycosides	8190000	7560000	7660000	10900000	11700000	11100000	11800000	13000000	13300000	11300000	12600000	10900000
Cit576	Positive	479.1	443.2	3.49	478.1	-	Isorhamnetin C-hexoside	Flavone C-glycosides	44200	44400	43500	64000	72400	53200	84500	64100	73700	75600	70300	70800
Cit492	Positive	565.1	397.8	3.55	564.1	-	C-hexosyl-apigenin O-pentoside	Flavone C-glycosides	2010000	2010000	2400000	2020000	1810000	1730000	5480000	5380000	5770000	2400000	1490000	1630000
Cit549	Positive	595.1	415.4	3.64	594.1	-	"di-C,C-hexosyl-apigenin"	Flavone C-glycosides	744000	1050000	1440000	17200	17000	17800	2150000	1720000	2010000	20000	21100	28500
Cit519	Positive	609.1	463.4	3.78	608.1	-	Chrysoeriol C-hexosyl-O-rhamnoside	Flavone C-glycosides	31900000	33300000	34000000	2400000	2510000	2940000	40500000	40800000	40400000	3490000	3030000	2890000
Cit461	Positive	611.1	299.8	3.71	610.1	-	8-C-hexosyl-luteolin O-hexoside	Flavone C-glycosides	3500000	3130000	4810000	337000	313000	144000	2490000	2930000	2710000	20400	23000	18900
Cit585	Positive	611.2	299.8	3.67	610.2	-	Luteolin 8-C-hexosyl-O-hexoside	Flavone C-glycosides	5870000	6830000	7540000	221000	195000	246000	9420000	9130000	10200000	288000	256000	273000
Cit447	Positive	771.1	367.9	3.9	770.1	-	6-C-hexosyl-apigenin O-feruloylhexoside	Flavone C-glycosides	16600	29400	23600	14000	9010	9080	28900	27500	16900	10500	8660	8280
Cit531	Positive	685.1	685	4.01	684.1	-	C-pentosyl apigenin O-salicyloyl hexoside	Flavone C-glycosides	6510	6080	8200	12200	6720	9760	14500	9770	22600	12000	13500	8000
Cit459	Positive	801	801	4.14	800	-	8-C-hexosyl-chrysoeriol O-feruloylhexoside	Flavone C-glycosides	37700	45600	95000	9	9	9	127000	138000	135000	9	9	9
Cit506	Positive	655.2	655	4.37	654.2	-	C-hexosyl-luteolin O-sinapic acid	Flavone C-glycosides	150000	173000	282000	9	9	9	590000	500000	579000	9	9	9
Cit518	Positive	463.1	301.8	4.69	462.1	-	Chrysoeriol C-hexoside	Flavone C-glycosides	9950	10900	10100	15400	19500	11700	10400	9040	9920	9530	6360	10500
Cit455	Positive	625	397.8	3.41	624	-	8-C-hexosyl chrysoeriol O-hexoside	Flavone C-glycosides	117000	98600	88100	22400	18800	16900	227000	235000	457000	14000	13700	16600
Cit517	Positive	463.1	367.8	3.85	462.1	-	Chrysoeriol 8-C-hexoside	Flavone C-glycosides	4860000	6930000	8720000	189000	203000	197000	13000000	11600000	13100000	207000	213000	199000
Cit1233	Negative	755.1	311.4	3.64	756.1	-	Chrysoeriol C-pentosyl-O-hexosyl-O-hexoside	Flavone C-glycosides	172000	147000	133000	9	9	9	354000	375000	339000	9	9	9
Cit1253	Negative	449.1	329.3	3.3	450.1	-	Eriodictyol C-hexoside	Flavone C-glycosides	94700	104000	91000	925000	1020000	553000	50900	50600	51100	219000	135000	97300
Cit1271	Negative	447.1	327.3	3.37	448.1	-	Luteolin C-hexoside	Flavone C-glycosides	202000	308000	364000	19600	14100	24600	604000	598000	545000	28300	24300	27900
Cit762	Negative	431.106	431.1	3.7	432.106	C01714	Isovitexin	Flavone C-glycosides	53800	68200	82500	134000	135000	111000	118000	132000	93500	140000	109000	112000
Cit385	Positive	579	433.1	3.49	578.164	C12628	Vitexin 2''-O-beta-L-rhamnoside	Flavone C-glycosides	30800000	29200000	31500000	30900000	28900000	28700000	36700000	36300000	36900000	29800000	27800000	26900000
Cit639	Positive	521	317.6	4.46	520	-	Naringenin O-malonylhexoside	Flavanone	153000	168000	259000	9	9	9	361000	355000	322000	9	9	9
Cit1260	Negative	477.1	357.3	3.44	478.1	-	Hesperetin O-Glucuronic acid	Flavanone	2340000	3710000	5790000	4370000	6770000	4790000	4490000	4050000	4690000	6010000	6210000	5860000
Cit1262	Negative	549.2	387.3	3.99	550.2	-	Hesperetin O-malonylhexoside	Flavanone	50200	36200	92000	172000	270000	167000	82600	114000	67800	225000	159000	133000
Cit966	Negative	609.2	301.3	4.03	610.19	C09806	Hesperetin 7-O-neohesperidoside (Neohesperidin)	Flavanone	994000	526000	485000	422000	583000	511000	391000	239000	330000	123000	203000	141000
Cit295	Positive	581.179	57.1	3.92	580.179	C09789	Naringenin 7-O-neohesperidoside (Naringin)	Flavanone	1040000	1100000	1110000	2320000	2650000	2460000	2580000	2780000	2630000	2720000	2230000	1880000
Cit294	Positive	435.121	273.1	4.17	434.121	C09099	Naringenin 7-O-glucoside (Prunin)	Flavanone	33400	87100	54800	155000	191000	130000	60400	66800	75000	169000	139000	148000
Cit386	Positive	355.15	178.9	8.24	354.147	C16417	Xanthohumol	Flavanone	9200	7930	7490	9	9	9	7360	7650	8020	9	9	9
Cit167	Positive	289.063	153.1	5.03	288.063	C05631	Eriodictyol	Flavanone	136000	156000	228000	492000	542000	520000	458000	460000	479000	567000	585000	584000
Cit965	Negative	463.132	301.1	3.81	464.132	-	Hesperetin 5-O-glucoside	Flavanone	1100000	536000	499000	78300	44000	54100	1040000	887000	727000	62700	39500	31800
Cit189	Positive	303.079	303.1	5.72	302.079	C01709	Hesperetin	Flavanone	41100	24800	10900	9	9	9	44600	59900	105000	9	9	9
Cit191	Positive	611.19	303	4	610.19	C09755	Hesperetin 7-rutinoside (Hesperidin)	Flavanone	588000	540000	569000	47100	51000	63900	711000	727000	743000	81600	39900	42400
Cit987	Negative	593	285.2	4.9	594.195	C09830	Isosakuranetin-7-neohesperidoside (Poncirin)	Flavanone	22400000	24500000	30300000	46700000	47100000	47500000	46000000	46700000	45400000	48700000	48700000	48800000
Cit204	Positive	257	137.1	6.05	256.074	C08650	Isoliquiritigenin	Flavanone	9	9	9	9	9	9	14600	13400	16000	9	9	9
Cit761	Negative	301.1	151	5.71	302.279	C09756	Homoeriodictyol	Flavanone	15900	9100	7080	9	9	9	21100	23800	47000	9	9	9
Cit986	Negative	285.08	164	6.81	286.084	C05334	Isosakuranetin (4'-Methylnaringenin)	Flavanone	7830	9400	5230	4830	6580	5120	25900	21000	16600	5680	6300	4330
Cit682	Positive	399	207.5	3.04	398	-	O-Sinapoyl quinic acid	Quinate and its derivatives	76300	68500	167000	13600	19300	14800	339000	358000	374000	13300	17600	9630
Cit1205	Negative	337	275.8	3.24	338	-	5-O-p-Coumaroylquinic acid	Quinate and its derivatives	22000	24500	22100	12100	7040	9130	53400	58300	59200	9	9	9
Cit1201	Negative	353.1	191.2	2.91	354.1	-	4-O-Caffeoyl quinic acid (criptochlorogenic acid)	Quinate and its derivatives	129000	118000	133000	29900	28600	28400	59300	31800	43600	15900	16800	16800
Cit1204	Negative	481.1	445.4	2.52	482.1	-	5-O-p-coumaroyl shikimic acid O-hexoside	Quinate and its derivatives	42200	22400	27000	55600	56400	68500	67700	69000	65100	102000	69500	80800
Cit1195	Negative	481.1	319.3	3.13	482.1	-	3-O-p-coumaroyl shikimic acid O-hexoside	Quinate and its derivatives	181000	98100	163000	21000	17700	20400	257000	324000	249000	13100	29000	20300
Cit1192	Negative	337.1	190.9	3.46	338.1	-	3-O-p-Coumaroyl quinic acid	Quinate and its derivatives	824000	413000	804000	37300	39800	47400	2180000	2490000	2330000	16500	28000	19600
Cit883	Negative	353.095	191.1	2.74	354.095	C00852	Chlorogenic acid (3-O-Caffeoylquinic acid)	Quinate and its derivatives	137000	121000	120000	141000	110000	121000	804000	873000	642000	159000	150000	114000
Cit1074	Negative	353	191.1	2.58	354.095	C17147	Neochlorogenic acid (5-O-Caffeoylquinic acid)	Quinate and its derivatives	128000	120000	120000	118000	126000	121000	691000	678000	533000	129000	147000	96800
Cit1122	Negative	191	85	1.13	192.063	C00296	Quinic acid	Quinate and its derivatives	14600000	16300000	16600000	45700000	35500000	41900000	1300000	901000	1120000	2720000	2440000	3080000
Cit570	Positive	138.091	77.2	1.18	137.091	-	Hydroxyphenethylamine	Others	4250000	5500000	4590000	1410000	2420000	1770000	5800000	5510000	5760000	645000	738000	643000
Cit565	Positive	142.1	82.9	0.58	141.1	C00860	Histidinol	Others	35800000	35700000	34600000	43400000	40000000	41800000	31600000	31900000	24700000	34800000	35700000	41300000
Cit483	Positive	122	105.3	2.31	121	C09815	Benzamide	Others	24300	23900	24800	6410	7990	7230	28000	31300	27400	9	9	9
Cit507	Positive	387.1	331.8	7.59	386.1	C00187	Cholesterol	Others	61000	67200	40600	33700	30400	37100	36400	30800	41300	22300	23900	32500
Cit469	Positive	136.1	119.3	1.89	135.1	-	Aminopurine	Others	384000	565000	521000	211000	229000	177000	385000	318000	305000	80900	77000	79700
Cit437	Positive	144.1	142.9	2.62	143.1	C04294	4-Methyl-5-thiazoleethanol	Others	6150	5880	6330	34400	15900	20800	8360	8250	14800	11300	11500	8900
Cit482	Positive	390.4	284.9	6.91	389.4	-	Azoxystrobin acid	Others	139000	87100	119000	110000	63400	64000	66800	105000	119000	49900	62300	68100
Cit544	Positive	302.4	284.9	7.3	301.4	-	D-erythro-Dihydrosphingosine	Others	25200	24700	30000	248000	75900	150000	33400	14700	140000	25600	30300	37100
Cit690	Positive	503.2	311.8	3.74	502.2	-	Phellodensin F	Others	315000	278000	238000	4250000	5770000	3560000	1050000	1270000	1290000	5040000	4090000	3690000
Cit657	Positive	275.1	258.1	5.98	274.1	-	N-Lauryldiethanolamine	Others	50000	41400	43900	35800	28300	26100	29700	41400	55900	18800	30100	28600
Cit692	Positive	149	121.3	9.64	148	-	Phthalic anhydride	Others	153000	192000	144000	220000	160000	183000	112000	100000	131000	120000	121000	119000
Cit421	Positive	474.2	327.8	2.42	473.2	C00234	10-Formyl-THF	Others	2320000	2240000	2220000	3250000	2590000	2580000	2610000	2460000	3060000	1780000	1690000	1790000
Cit528	Positive	343.1	240.9	6.53	342.1	-	Cocamidopropyl betaine	Others	166000	203000	224000	157000	108000	137000	293000	226000	1880000	97900	127000	96100
Cit981	Negative	179.157	87	0.74	180.063	C00137	Inositol	Others	1160000	1270000	1260000	2270000	2160000	1900000	1280000	1280000	1190000	1970000	1820000	1720000
Cit357	Positive	371.1	267.1	11.63	370.105	-	sesamolin	Others	167000	118000	170000	224000	166000	170000	114000	104000	164000	158000	153000	121000
Cit988	Negative	593.16	431.1	3.19	594.159	C08064	Isovitexin 7-O-glucoside (Saponarin)	Others	272000	294000	412000	74800	65200	73500	734000	661000	775000	93400	93900	91000
Cit900	Negative	367.13	134.1	7.26	368.126	C10443	Curcumin	Others	57700	39500	5320	9	9	9	129000	195000	178000	9	9	9
Cit321	Positive	122.1	105	2.39	121.089	C05332	Phenethylamine	Others	107000	132000	136000	43100	44500	39900	159000	143000	124000	9	9	9
Cit150	Positive	106	88.1	0.68	105.079	C06772	Diethanolamine	Others	26300	15000	30100	32000	21800	25800	67400	83200	77800	81000	80600	76400
Cit1069	Negative	742.1	620.2	1.22	743.075	C00006	NADP	Others	233000	182000	182000	55800	111000	76600	200000	198000	177000	98800	83400	104000
Cit71	Positive	140	98.9	0.59	139.027	C00870	4-Nitrophenol	Others	48000000	47500000	44700000	44900000	40200000	44400000	46400000	47900000	43900000	44300000	44400000	44700000
Cit1086	Negative	140	78.5	0.71	141.019	-	O-Phosphorylethanolamine	Others	26800	25600	50100	39800	42900	33800	41800	36100	43800	35800	56300	43900
Cit34	Positive	151.1	109	6.91	150.105	-	2-(-)-Carvone	Others	131000	203000	117000	7160	9010	9480	12400	7180	10900	9	9	9
Cit63	Positive	169.09	134.1	0.66	168.09	C00534	4-(Aminomethyl)-5-(hydroxymethyl)-2-methylpyridin-3-ol	Others	19100	18600	25700	25000	14200	14900	18600	17300	18600	19900	12000	16900
Cit250	Positive	400.33	341.4	8.17	399.335	C02990	L-Palmitoylcarnitine	Others	751	795	1370	627	1120	776	1790	768	3870	606	790	607
Cit1223	Negative	341	179.2	3.01	342	-	Caffeic acid O-glucoside	Hydroxycinnamoyl derivatives	102000	65800	54300	7240	6710	9460	99400	109000	101000	7480	5920	5470
Cit453	Positive	207.1	147.4	3.21	206.1	-	6-Hydroxymethylherniarin	Hydroxycinnamoyl derivatives	154000	147000	154000	91700	92900	92900	144000	149000	164000	60800	72000	60600
Cit484	Positive	165.1	95.5	5.99	164.1	C10945	Caffeic aldehyde	Hydroxycinnamoyl derivatives	90000	105000	95600	12000	9030	12300	56900	51300	56900	9	9	9
Cit569	Positive	195.1	177.5	3.19	194.1	-	Hydroxy-methoxycinnamate	Hydroxycinnamoyl derivatives	57000	52400	52700	414000	402000	389000	324000	332000	378000	863000	807000	409000
Cit560	Positive	671.2	671	2.83	670.2	-	Gallic acid O-feruloyl-O-hexosyl-O-hexoside	Hydroxycinnamoyl derivatives	57600	70500	70400	9	9	9	9	9	9	9	9	9
Cit1190	Negative	207.1	192.1	5.49	208.1	-	"3,4-Dimethoxycinnamic acid"	Hydroxycinnamoyl derivatives	3650	2570	9	9	9	9	19300	20800	19100	9370	6020	4070
Cit1282	Negative	665.1	323.4	2.23	666.1	-	O-Caffeoyl maltotriose	Hydroxycinnamoyl derivatives	9	9	9	9	4440	2280	3090	2020	1450	42600	51800	50100
Cit1224	Negative	311.1	149.2	2.19	312.1	-	Caftaric acid	Hydroxycinnamoyl derivatives	58900	46000	52500	143000	129000	116000	50300	45200	50300	60800	68000	59500
Cit1250	Negative	591.1	367.4	4.88	592.1	-	Disinapoyl hexoside	Hydroxycinnamoyl derivatives	961000	661000	1870000	166000	142000	145000	2830000	3130000	2980000	129000	131000	77100
Cit1181	Negative	385.1	223.2	3.15	386.1	-	1-O-beta-D-Glucopyranosyl sinapate	Hydroxycinnamoyl derivatives	28600000	26500000	27200000	39200000	35300000	36400000	47700000	47000000	47200000	47200000	49000000	48600000
Cit803	Negative	151.047	136.1	4.09	152.047	-	2-Methoxybenzoic acid	Hydroxycinnamoyl derivatives	8020	11000	14800	4270	5180	4010	55700	36700	43300	3950	9850	7790
Cit49	Positive	167.063	149.1	3.57	166.063	C01744	3-(4-Hydroxyphenyl)propionic acid	Hydroxycinnamoyl derivatives	308000	484000	430000	74200	98700	59700	9	9	9	9	9	9
Cit373	Positive	133.058	115	5.83	132.058	C00903	trans-cinnamaldehyde	Hydroxycinnamoyl derivatives	16700	20500	9370	36800	28200	31200	14800	19600	14700	7670	5070	5890
Cit809	Negative	237.084	103.1	5	238.084	-	"3,4,5-Trimethoxycinnamic acid"	Hydroxycinnamoyl derivatives	6950	8880	5780	1780	2500	1160	23300	52200	15800	9	9	9
Cit892	Negative	177.063	177.1	4.59	178.063	C02666	Coniferylaldehyde	Hydroxycinnamoyl derivatives	9100	12800	13600	38000	41500	25700	19700	23100	19300	48000	34800	26900
Cit1144	Negative	371.1	209.2	2.76	372.142	C01533	Syringin	Hydroxycinnamoyl derivatives	58300	69100	78800	157000	169000	151000	250000	215000	233000	224000	204000	257000
Cit345	Positive	229.079	135	4.59	228.079	C03582	Resveratrol	Hydroxycinnamoyl derivatives	273000	306000	223000	251000	225000	207000	9	9	9	9	9	9
Cit891	Negative	179.079	146.1	3.86	180.079	C00590	Coniferyl alcohol	Hydroxycinnamoyl derivatives	26500	35000	39600	19200	13100	20900	17100	29600	20200	22200	10700	10600
Cit1105	Negative	357.142	136.1	5.36	358.142	-	Pinoresinol	Hydroxycinnamoyl derivatives	2490	3670	4020	19900	12900	7960	6670	17200	4430	12000	8330	2780
Cit358	Positive	225.069	149.1	3.74	224.069	C00482	Sinapic acid	Hydroxycinnamoyl derivatives	317000	314000	526000	97600	134000	95500	472000	646000	538000	83700	47800	93000
Cit1138	Negative	209	179.1	3.83	210.089	C02325	Sinapyl alcohol	Hydroxycinnamoyl derivatives	292000	344000	279000	557000	548000	584000	110000	111000	111000	375000	341000	317000
Cit890	Negative	341	179.1	2.72	342.132	C00761	Coniferin	Hydroxycinnamoyl derivatives	6930000	5080000	3160000	9	9	9	5270000	4800000	5090000	9	9	9
Cit1096	Negative	149	130.1	3.5	150.068	C02646	p-Coumaryl alcohol	Hydroxycinnamoyl derivatives	10200	10600	11700	8070	9400	11100	5070	10700	5900	8000	4290	4260
Cit1137	Negative	207.1	177.1	4.43	208.074	-	Sinapinaldehyde	Hydroxycinnamoyl derivatives	77000	93400	87500	71000	45400	46900	71300	46000	31500	24100	29900	21900
Cit315	Positive	149.1	131	4.12	148.052	-	p-Coumaraldehyde	Hydroxycinnamoyl derivatives	647000	527000	449000	95100	113000	90300	9	19900	9	9	9	9
Cit442	Positive	219.1	189.5	3.78	218.1	C08309	"5-Methoxy-N,N-dimethyltryptamine"	Tryptamine derivatives	13300	7640	6550	137000	113000	99300	8030	10100	11700	144000	114000	73500
Cit653	Positive	485.1	147.5	3.78	484.1	-	N-hexosyl-p-coumaroyl serotonin	Tryptamine derivatives	9	9	9	83600	81700	56400	11500	9	9	60400	51600	36100
Cit654	Positive	177.2	160.5	1.55	176.2	C17203	N-hydroxy tryptamine	Tryptamine derivatives	106000	676000	146000	22500	36300	27700	38200	48000	53400	7470	10400	10700
Cit256	Positive	161.1	144.2	2.72	160.1	C00398	L-Tryptamine	Tryptamine derivatives	96400	222000	148000	66100	62800	47100	199000	123000	128000	10800	21700	18900
Cit271	Positive	233	174.1	4.35	232.121	C01598	Melatonin	Tryptamine derivatives	21600	25800	27900	34400	40100	31700	30200	30000	23400	15200	16800	17100
Cit356	Positive	177	160.2	1.58	176.095	C00780	serotonin	Tryptamine derivatives	190000	1130000	289000	41300	60300	35000	67600	72700	78200	16800	18400	17900
Cit304	Positive	175	144.1	2.7	174.116	C06213	N-Methyltryptamine	Tryptamine derivatives	12800	82500	17100	123000	72600	62500	101000	54200	40600	21900	26000	23500
Cit283	Positive	219	160.1	3.23	218.106	C00978	N-Acetyl-5-hydroxytryptamine	Tryptamine derivatives	225000	346000	293000	217000	401000	376000	246000	241000	257000	75300	75200	77400
Cit568	Positive	166.1	121.4	1.45	165.1	C06199	Hordenine	Alkaloids	459000	496000	305000	61000	37600	57900	249000	227000	291000	17400	14800	21700
Cit695	Positive	86.1	56	1.16	85.1	C01746	Piperidine	Alkaloids	846000	865000	794000	1120000	1300000	1200000	713000	766000	700000	960000	995000	853000
Cit982	Negative	433.121	433	3.72	434.121	-	Isohemiphloin	Alkaloids	869000	935000	1150000	854000	1120000	1130000	907000	1040000	938000	1950000	2010000	1870000
Cit112	Positive	118.1	118.1	0.78	117.079	C00719	Betaine	Alkaloids	198000	208000	226000	378000	413000	476000	206000	240000	209000	333000	365000	282000
Cit376	Positive	138	137.9	0.79	137.048	C01004	Trigonelline	Alkaloids	4370000	4970000	4560000	9290000	7940000	7700000	3240000	3390000	3470000	7980000	6860000	7220000
Cit540	Positive	121.042	77.1	1.14	120.042	-	D(-)-Threose	Carbohydrates	614000	764000	647000	221000	344000	261000	844000	799000	712000	96000	98700	72000
Cit1184	Negative	213.1	78.9	0.97	214.1	C00672	2-Deoxyribose 1-phosphate	Carbohydrates	353000	261000	323000	164000	202000	229000	112000	113000	138000	160000	175000	143000
Cit1247	Negative	649.1	503.3	0.74	650.1	-	D(+)-Melezitose O-rhamnoside	Carbohydrates	78600	80400	96000	97100	110000	119000	45700	54700	47800	130000	96400	59200
Cit1276	Negative	665.1	485.3	0.77	666.1	C02052	Maltotetraose	Carbohydrates	27900	15900	28400	11900	7410	9270	14300	25300	32800	11300	14500	11700
Cit1258	Negative	289.1	97	1.09	290.1	-	Glucarate O-Phosphoric acid	Carbohydrates	3260000	2660000	5380000	24800000	12500000	16600000	1250000	1620000	1660000	9040000	5900000	5990000
Cit1298	Negative	421.1	241.2	0.69	422.1	C00689	Trehalose 6-phosphate	Carbohydrates	96900	69700	96700	56200	65800	61400	92700	101000	147000	109000	110000	145000
Cit908	Negative	503.442	323.2	0.79	504.169	-	D(+)-Melezitose	Carbohydrates	2440000	2330000	3160000	1520000	1780000	2370000	2500000	2070000	2270000	2770000	2520000	3070000
Cit909	Negative	341	58.8	0.78	342.116	-	D-(+)-Sucrose	Carbohydrates	14900000	12900000	14000000	13300000	12200000	11000000	14300000	18500000	17700000	15900000	17100000	19300000
Cit952	Negative	195.157	75.1	0.7	196.058	C00257	Gluconic acid	Carbohydrates	7530000	8010000	7090000	4480000	4740000	4340000	4070000	4190000	4410000	5420000	4750000	4770000
Cit906	Negative	177.14	70.8	0.78	178.048	C00198	"D-(+)-Glucono-1,5-lactone"	Carbohydrates	92200	78800	67100	78300	80000	59600	68900	88400	87300	37800	45900	58000
Cit907	Negative	179	70.9	0.76	180.063	C00031	D(+)-Glucose	Carbohydrates	3160000	3360000	3850000	3930000	3770000	4070000	2650000	2880000	4170000	2370000	2510000	3140000
Cit923	Negative	149	58.9	0.77	150.053	-	DL-Arabinose	Carbohydrates	249000	261000	254000	348000	296000	289000	200000	165000	136000	152000	130000	202000
Cit286	Positive	222	138.1	0.6	221.09	C00140	N-Acetyl-D-glucosamine	Carbohydrates	347000	372000	365000	549000	459000	510000	245000	323000	419000	642000	401000	476000
Cit918	Negative	259	96.9	0.69	260.03	C00092	D-Glucose 6-phosphate	Carbohydrates	2700000	2550000	2570000	2330000	2330000	2370000	1860000	2010000	2520000	2320000	2180000	2010000
Cit928	Negative	289	78.9	1.08	290.04	-	D-Sedoheptuiose 7-phosphate	Carbohydrates	2250000	2110000	2340000	13100000	10000000	11400000	1230000	1120000	1350000	6540000	5180000	5970000
Cit917	Negative	193.141	72.9	0.72	194.043	C00191	D-glucoronic acid	Carbohydrates	193000	153000	179000	264000	258000	271000	195000	224000	240000	327000	242000	227000
Cit693	Positive	319.1	301.9	6.82	318.1	-	Phytocassane C	Terpenoids	35400	37100	45400	320000	108000	204000	63800	32400	54500	48000	47700	60200
Cit1023	Negative	469.2	469.1	6.45	470.184	C03514	Limonin	Terpenoids	549000	691000	635000	1130000	2110000	1140000	287000	254000	292000	2520000	2810000	2420000
Cit700	Positive	332.1	314.7	1.14	331.1	-	Pyridoxine O-glucoside	Vitamins	3060000	2970000	3240000	1530000	2250000	1830000	3250000	2870000	2600000	1400000	1760000	1650000
Cit698	Positive	494.1	332.8	1.46	493.1	-	Pyridoxine di-O-hexoside	Vitamins	17700	15800	14800	9010	8390	6860	8320	14600	10200	6540	4560	6880
Cit410	Positive	123.1	80.3	1.49	122.1	C00153	Niacinamide	Vitamins	21200	40500	40700	14800	21200	22600	44900	29000	35100	11800	14500	9380
Cit439	Positive	346	184.5	1.57	345	-	4-Pyridoxic acid O-hexoside	Vitamins	60600	55000	77200	66600	45900	44200	77900	63000	57500	41100	35500	28500
Cit398	Positive	220.2	202.7	2.28	219.2	C00864	D-Pantothenic acid	Vitamins	4190000	4650000	4550000	5050000	4720000	5110000	4650000	4500000	4150000	3630000	3370000	3480000
Cit699	Positive	508.1	152.5	3.15	507.1	-	Pyridoxine O-feruloyl hexoside	Vitamins	3120	3110	2980	1600	3020	829	2630	3870	1330	1730	771	802
Cit1172	Negative	263.1	147.2	0.71	264.1	C00378	Thiamine	Vitamins	26300	23600	27800	14800	14000	10100	25500	29700	28000	13900	17300	12800
Cit272	Positive	445.3	281	10.71	444.303	C00828	Menaquinone (K2)	Vitamins	118000	112000	131000	140000	134000	158000	103000	83700	103000	133000	130000	89000
Cit336	Positive	170.1	134.1	1.11	169.074	C00314	Pyridoxine	Vitamins	27500	25200	17900	61400	29800	43500	31100	35000	32300	24900	15800	17600
Cit301	Positive	138.05	78	3.69	137.048	-	Nicotinic Acid Methyl Ester (Methyl Nicotinate)	Vitamins	17000	9	9	9	9	9	41900	41700	50200	53900	54400	54500
Cit1125	Negative	375	255.2	3.17	376.138	C00255	Riboflavin	Vitamins	58800	65200	58200	23100	22900	30200	115000	108000	93000	26500	24400	24200
Cit1007	Negative	175	87	0.99	176.12	C00072	L-ascorbate	Vitamins	19900000	16300000	18800000	3760000	8680000	7270000	16600000	13700000	13700000	13500000	14300000	13400000
Cit1088	Negative	155	111	1.08	156.017	C00295	Orotic acid	Vitamins	25600	9320	25300	53100	32500	35600	153000	146000	188000	102000	163000	123000
Cit1156	Negative	383	281.1	5.61	384.339	C05443	Vitamin D3	Vitamins	36800	37300	30400	9	9	9	21400	24300	25300	9	9	9
Cit1092	Negative	277.13	146.2	2.75	278.13	C00831	Pantetheine	Vitamins	54900	67700	65900	29500	25200	32900	54600	58200	59200	18300	18800	15500
Cit667	Positive	369.119	207.5	3.72	368.119	-	N-sinapoyl hydroxycoumarin	Coumarins	1760000	2300000	1630000	3100000	2470000	2760000	2270000	2880000	2390000	2530000	2340000	2310000
Cit1199	Negative	485.1	323.3	3.33	486.1	-	4-hydroxycoumarin di-glucoside	Coumarins	31300	41000	53100	33900	48300	39100	44000	43800	52800	45100	59700	51400
Cit1254	Negative	703.4	351.3	2.48	704.4	-	Esculetin O-quinacyl esculetin O-quinic acid	Coumarins	36400	22600	13600	9	9	9	9	9	9	9	9	9
Cit1198	Negative	337.1	143.2	4.36	338.1	-	4-Hydroxy-7-methoxycoumarin-beta-rhamnoside	Coumarins	58000	29200	32700	9	9	9	53300	40000	50400	9	9	9
Cit1132	Negative	191	176.1	4.11	192.042	C01752	Scopoletin (7-Hydroxy-5-methoxycoumarin)	Coumarins	32500	19000	15900	9	25100	8930	26200	66400	22900	9	9	9
Cit88	Positive	161	105.1	6.02	160.052	-	6-MethylCoumarin	Coumarins	15400	14300	12700	9	9	9	18400	10200	15500	9	9	9
Cit87	Positive	209.2	194.1	3.57	208.037	C09265	"6-Methoxy-7,8-DihydroxyCoumarin"	Coumarins	259000	278000	218000	170000	192000	140000	224000	170000	248000	192000	222000	122000
Cit939	Negative	339.1	177.1	2.71	340.079	C09264	"Esculin (6,7-Dihydroxycoumarin-6-glucoside)"	Coumarins	110000	104000	110000	123000	537000	203000	115000	115000	92500	35500	138000	62900
Cit111	Positive	217	202	6.43	216.042	C01557	Bergapten	Coumarins	36600	67800	64100	111000	156000	65700	30900	45900	37800	42900	22400	32100
Cit353	Positive	207.06	207.1	4.73	206.058	C09311	Scoparone	Coumarins	6030000	89400	172000	9	29900	9	2100000	4650000	1940000	63500	352000	84100
Cit656	Positive	286	124.3	2.03	285	-	Nicotinic acid-hexoside	Nicotinic acid derivatives	1300000	606000	659000	816000	979000	752000	2850000	2810000	3990000	4820000	5100000	4990000
Cit655	Positive	256.2	124	0.8	255.2	C05841	Nicotinate ribonucleoside	Nicotinic acid derivatives	2780000	2760000	2900000	1180000	1100000	967000	2570000	2460000	3270000	800000	865000	832000
Cit311	Positive	287.048	241.1	4.83	286.048	C10510	"Orobol (5,7,3',4'-tetrahydroxyisoflavone)"	Isoflavone	3990	3550	4240	7050	9290	6810	7000	12500	9980	9930	8740	9330
Cit951	Negative	431	269.1	3.93	432.106	C09126	Genistein 7-O-Glucoside (Genistin)	Isoflavone	89400	103000	89700	112000	94200	100000	37100	35100	42000	21700	27800	31700
Cit113	Positive	285	270.2	7	284.069	C00814	Biochanin A	Isoflavone	21400	25100	17600	7370	11200	7430	34900	47400	29300	7510	5200	5670
Cit182	Positive	285	285	5.02	284.069	C14536	Glycitein	Isoflavone	919000	1250000	1600000	2240000	2130000	2080000	2260000	2340000	2540000	1920000	1680000	1350000
Cit4	Positive	287	217.1	4.79	286.048	C12134	2'-Hydroxygenistein	Isoflavone	11100000	12400000	14800000	22400000	23700000	23600000	22300000	22900000	23200000	24200000	24400000	24700000
Cit767	Negative	283	268.1	6.95	284.069	C10521	Prunetin	Isoflavone	103000	109000	68300	57900	80800	41500	296000	398000	244000	73900	65200	50300
Cit361	Positive	447.12	285.1	5.18	446.121	C05376	Sissotrin	Isoflavone	95900	56700	80100	93200	108000	101000	165000	159000	270000	53400	85900	63100
Cit624	Positive	206.1	147.5	2.48	205.1	C05660	Methoxyindoleacetic acid	Indole derivatives	806000	1300000	1140000	1780000	2110000	2140000	210000	187000	211000	259000	265000	250000
Cit572	Positive	118	58.2	2.47	117	C00463	Indole	Indole derivatives	257000	361000	320000	468000	490000	484000	88800	90400	70900	128000	118000	132000
Cit59	Positive	190.08	130.1	5.27	189.079	-	3-Indolepropionic acid	Indole derivatives	5550	4650	11800	6220	7960	8500	5160	8050	6530	3980	5960	3090
Cit419	Positive	132.1	86.2	0.99	131.1	C00430	5-Aminolevulinate	Organic acids	68900	66700	71500	101000	55000	54600	243000	267000	263000	237000	262000	256000
Cit1277	Negative	145.06	74	0.73	146.06	-	Methylglutaric acid	Organic acids	19500	20400	18400	30100	30200	34000	3830	6270	2870	17800	20200	15200
Cit1196	Negative	197	135.1	0.7	198	C05584	4-Hydroxy-3-methoxymandelate	Organic acids	17000	21400	17700	14000	23400	13900	7930	8200	10600	24200	20000	23300
Cit1222	Negative	289.1	191.2	0.69	290.1	C03406	Argininosuccinate	Organic acids	2010000	1580000	2950000	5250000	5390000	4440000	1020000	720000	1150000	4430000	2690000	2990000
Cit1243	Negative	147	85	0.92	148	C00815	Citramalate	Organic acids	203000	337000	204000	135000	229000	234000	219000	221000	173000	275000	229000	261000
Cit1248	Negative	153	78.9	1.61	154	C06608	Diethyl phosphate	Organic acids	77900	483000	109000	92600	304000	506000	512000	54500	81900	287000	54200	550000
Cit1186	Negative	175.1	131.3	2.74	176.1	C02504	2-Isopropylmalate	Organic acids	765000	829000	872000	627000	802000	702000	72600	67800	58600	185000	205000	199000
Cit821	Negative	103.047	103	1.39	104.047	-	3-Hydroxybutyrate	Organic acids	858000	791000	696000	386000	517000	480000	569000	408000	527000	410000	360000	359000
Cit997	Negative	188.043	144.1	2.71	189.043	C01717	Kynurenic acid	Organic acids	39000	48100	53200	98800	107000	107000	49200	47300	41000	53900	60000	60800
Cit170	Positive	183.058	137.1	4.63	182.058	-	"Ethyl 3,4-Dihydroxybenzoate (Ethyl protocatechuate)"	Organic acids	18800	44300	17600	18000	24800	40900	39400	17600	18200	35100	13200	40000
Cit44	Positive	113.016	94.9	2.24	112.016	-	2–furanoic acid	Organic acids	80500	53600	74800	9	9	9	95200	78800	56700	9	9	9
Cit953	Negative	131.042	86.9	1.9	132.042	C00489	Glutaric acid	Organic acids	1630000	1910000	1720000	3690000	3790000	4510000	4040000	3470000	3280000	8380000	7690000	6970000
Cit862	Negative	145.058	80.9	2.63	146.058	C06104??	Adipic acid	Organic acids	74600	91800	81900	116000	123000	142000	53600	64200	65300	79400	91900	86800
Cit873	Negative	187.105	125.1	4.43	188.105	C08261	Azelaic Acid	Organic acids	398000	391000	390000	397000	348000	345000	364000	328000	427000	418000	390000	456000
Cit805	Negative	131.042	86.9	2.08	132.042	-	2-Methylsuccinic acid	Organic acids	2010000	2280000	2020000	4340000	4730000	4910000	4460000	4050000	4130000	9530000	9460000	8790000
Cit927	Negative	229.152	167.2	6.12	230.152	C02678	Dodecanedioic aicd	Organic acids	2860	2390	2770	2300	3090	3160	3160	2590	3580	2550	2610	2170
Cit82	Positive	132.095	76.9	1	131.095	C02378	6-Aminocaproic acid	Organic acids	380000	378000	402000	426000	553000	543000	376000	347000	309000	400000	461000	424000
Cit1145	Negative	165.027	121.1	3	166.027	C06337	Terephthalic acid	Organic acids	447000	686000	504000	509000	568000	858000	602000	563000	754000	622000	496000	794000
Cit1101	Negative	165.027	76.9	2.98	166.027	C01606	Phthalic acid	Organic acids	35700	39900	41700	39700	43900	46500	45100	41200	42100	36500	47500	43700
Cit66	Positive	146.085	85.9	0.77	145.085	C01035	4-Guanidinobutyric acid	Organic acids	55100	57700	38000	25200	14800	16400	85500	77900	74800	19100	17000	27400
Cit156	Positive	160.126	114.1	3.03	159.126	-	Dl-2-Aminooctanoic acid	Organic acids	45900	33800	47500	14900	17100	26400	73000	64000	69400	42200	45800	40100
Cit22	Positive	197.074	151.1	4.08	196.074	-	"(3,4-Dimethoxyphenyl) acetic acid"	Organic acids	9330	13400	9	9	9	9	9100	18200	7870	9	9	9
Cit1053	Negative	117.02	100	1.32	118.027	C02170	Methylmalonic acid	Organic acids	24400000	27700000	27100000	30600000	40600000	33400000	19600000	19700000	18600000	24700000	24500000	25100000
Cit970	Negative	167.1	122.1	2.26	168.042	C00544	Homogentisic acid	Organic acids	380000	339000	366000	209000	308000	271000	401000	390000	365000	153000	141000	145000
Cit161	Positive	477.2	258.1	2.25	476.168	C12276	D-Pantothenic dcid	Organic acids	4700	4050	3780	34100	33700	33900	3180	2190	1980	17800	13200	15200
Cit915	Negative	117	99.8	0.73	118.027	-	D-Erythronolactone	Organic acids	29300	22400	18300	17100	23200	13800	20700	28200	17300	20200	18300	16200
Cit1141	Negative	117.03	99.9	1.31	118.027	C00042	Succinic acid	Organic acids	24800000	28800000	27100000	29200000	40200000	33000000	18700000	19600000	19200000	24400000	24800000	23800000
Cit893	Negative	130.07	88	0.93	131.07	C00300	Creatine	Organic acids	5060000	5200000	5470000	1100000	1590000	1390000	4690000	3880000	3840000	1270000	1140000	1090000
Cit1140	Negative	173.1	83	3.82	174.089	C08278	Suberic acid	Organic acids	20800	22300	18000	31000	28200	33500	28200	26300	25500	31500	22600	25700
Cit151	Positive	189.1	87	6.15	188.105	-	Diethylglutarate	Organic acids	8760	8080	7010	18500	15800	15900	5270	7380	6180	12000	8680	9830
Cit999	Negative	133	70.8	0.97	134.022	C00497	L(-)-Malic acid	Organic acids	97400000	106000000	87800000	79100000	99400000	93000000	80700000	84300000	81000000	106000000	112000000	109000000
Cit889	Negative	191	131	0.84	192.027	C00158	Citric acid	Organic acids	8170000	36600000	8100000	59100000	42200000	53800000	8850000	8770000	8440000	5210000	5430000	5270000
Cit776	Negative	131.08	68.9	3.51	132.079	-	(S)-(-)-2-Hydroxyisocaproic acid	Organic acids	106000	99400	83000	47500	38700	47400	229000	232000	208000	37900	56500	54800
Cit948	Negative	115	97.9	1.11	116.011	C00122	Fumaric acid	Organic acids	121000	103000	108000	24900	86000	66400	73500	82700	125000	101000	102000	90700
Cit864	Negative	145	80.8	1.13	146.022	-	A-Ketoglutaric acid	Organic acids	406000	483000	409000	673000	646000	520000	251000	269000	225000	166000	222000	181000
Cit1090	Negative	159.1	58.8	1.17	160.037	C00322	Oxoadipic acid	Organic acids	433000	377000	505000	528000	509000	476000	150000	110000	91900	96700	70100	92700
Cit828	Negative	144.074	102	1.62	145.074	C02946	4-Acetamidobutyric acid	Organic acids	317000	239000	250000	70700	104000	79500	99500	89600	75100	44800	40200	31900
Cit960	Negative	166.037	124.1	0.77	167.037	-	Guanidinoethyl sulfonate	Organic acids	46400	53900	71700	42300	59500	49600	105000	131000	91700	80100	86400	67500
Cit390	Positive	104.06	87	0.77	103.063	C00334	γ-aminobutyric acid	Organic acids	1410000	1530000	1780000	3210000	2200000	2190000	2070000	2210000	1900000	3440000	3280000	3110000
Cit942	Negative	131.04	86.9	1.89	132.042	-	ethylmalonate	Organic acids	17000	17800	12100	28300	38800	43700	34200	36300	35100	72000	62300	76300
Cit368	Positive	556.28	371.2	10.22	555.284	C05122	Taurocholic acid	Organic acids	47000	46200	48200	45600	46400	48100	46300	47800	54000	47000	41800	47900
Cit867	Negative	118	73.9	1.32	119.022	C00872	Aminomalonic acid	Organic acids	907000	1090000	1040000	1200000	1610000	1310000	720000	745000	745000	893000	893000	967000
Cit775	Negative	147.07	58.8	1.3	148.074	-	(Rs)-Mevalonic acid	Organic acids	1500000	1560000	1310000	626000	615000	678000	2500000	2390000	2270000	1110000	1010000	979000
Cit1147	Negative	141.03	58.7	0.69	142.027	-	"trans,trans-Muconic acid"	Organic acids	103000	111000	102000	38300	111000	59200	429000	732000	602000	154000	176000	76500
Cit804	Negative	145.06	101.1	2.63	146.058	-	2-Methylglutaric acid	Organic acids	72400	96300	89400	115000	113000	119000	62300	56900	68000	92700	93300	87300
Cit1108	Negative	577	407.3	2.87	578.142	-	Procyanidin B2	Proanthocyanidins	7310	8150	8120	6460	6290	6540	4020	9	2720	7490	10600	2520
Cit402	Positive	494.3	476.6	8.48	493.3	-	LysoPC 16:1	Lipids_Glycerophospholipids	24400	32400	57400	55400	66600	57000	5420	4500	5230	4550	8640	7010
Cit403	Positive	494.3	184.6	7.82	493.3	-	LysoPC 16:1 (2n isomer)	Lipids_Glycerophospholipids	488000	576000	749000	4000000	2670000	3300000	31400	31000	34400	54900	62500	71200
Cit407	Positive	520.3	502.3	8.36	519.3	-	LysoPC 18:2	Lipids_Glycerophospholipids	840000	1280000	1870000	1550000	1680000	1470000	139000	167000	164000	120000	174000	345000
Cit600	Positive	518.3	459.6	8.74	517.3	-	LysoPC 18:3	Lipids_Glycerophospholipids	1400000	2010000	3820000	6130000	3960000	4430000	226000	201000	233000	280000	402000	725000
Cit401	Positive	496.3	478.3	8.74	495.3	-	LysoPC 16:0	Lipids_Glycerophospholipids	8350000	11700000	17300000	19800000	15600000	15600000	1210000	1080000	1280000	1180000	1780000	3130000
Cit406	Positive	522.4	184.5	8.86	521.4	-	LysoPC 18:1 (2n isomer)	Lipids_Glycerophospholipids	6310000	7750000	11300000	22100000	18800000	21800000	1200000	1290000	1220000	1070000	1220000	1290000
Cit598	Positive	492.3	184.5	7.29	491.3	-	LysoPC 16:2 (2n isomer)	Lipids_Glycerophospholipids	43900	52200	60200	189000	82900	118000	9	9	9	9	9	9
Cit604	Positive	426.3	285.8	7.63	425.3	-	LysoPE 14:0	Lipids_Glycerophospholipids	6910	8950	11900	25800	23000	19300	1140	1390	1230	2090	2570	2510
Cit601	Positive	518.2	500.3	7.67	517.2	-	LysoPC 18:3 (2n isomer)	Lipids_Glycerophospholipids	11400000	12600000	16300000	21500000	19300000	20900000	1480000	1540000	1560000	849000	1070000	992000
Cit400	Positive	468.1	450.5	7.68	467.1	-	LysoPC 14:0	Lipids_Glycerophospholipids	26400	39300	55700	67400	45600	48300	10800	8640	11800	4410	7900	7420
Cit408	Positive	520	125	8.19	519	-	LysoPC 18:2 (2n isomer)	Lipids_Glycerophospholipids	3570000	4270000	6400000	9110000	7850000	8110000	345000	396000	369000	171000	236000	275000
Cit610	Positive	478.6	337.9	8.32	477.6	-	LysoPE 18:2 (2n isomer)	Lipids_Glycerophospholipids	249000	433000	610000	1530000	1440000	1220000	20800	24500	22500	64400	102000	104000
Cit405	Positive	522.1	125.5	9.04	521.1	-	LysoPC 18:1	Lipids_Glycerophospholipids	194000	326000	486000	822000	839000	794000	38900	40400	39800	61200	87800	101000
Cit605	Positive	482.1	341.9	9.8	481.1	-	LysoPE 18:0	Lipids_Glycerophospholipids	4530	7040	10900	191000	66500	91900	1160	9	9	1430	3370	2470
Cit593	Positive	412.3	184.7	5.64	411.3	-	LysoPC 10:0	Lipids_Glycerophospholipids	4720	8920	9940	3410	3760	2640	9	9	9	9	9	9
Cit596	Positive	480.1	184.5	7.66	479.1	-	LysoPC 15:1	Lipids_Glycerophospholipids	12100	14900	22900	29300	23900	23100	2740	9	9	9	9	9
Cit595	Positive	482.3	184.5	8.2	481.3	-	LysoPC 15:0	Lipids_Glycerophospholipids	89800	138000	208000	500000	376000	358000	21600	16200	19900	28000	36000	34700
Cit404	Positive	524.1	507.4	8.84	523.1	-	LysoPC 18:0 (2n isomer)	Lipids_Glycerophospholipids	15800	25000	37100	63500	61300	66700	3140	3290	2830	5140	6760	6930
Cit599	Positive	510.1	510.4	9.29	509.1	-	LysoPC 17:0	Lipids_Glycerophospholipids	127000	193000	367000	461000	301000	301000	22100	13000	19000	23500	33900	31500
Cit1168	Negative	452	255.3	8.69	453	-	LysoPE 16:0	Lipids_Glycerophospholipids	1650000	2940000	4510000	21000000	12500000	14000000	137000	119000	136000	598000	994000	1090000
Cit1169	Negative	478.1	281.4	8.99	479.1	-	LysoPE 18:1	Lipids_Glycerophospholipids	661000	1260000	1630000	12400000	12400000	10800000	79500	90100	71900	624000	915000	901000
Cit1170	Negative	478.1	281.3	8.81	479.1	-	LysoPE 18:1 (2n isomer)	Lipids_Glycerophospholipids	803000	1080000	1480000	1580000	1510000	1330000	50600	63200	56900	135000	147000	158000
Cit603	Positive	544.4	544.4	8.89	543.4	-	LysoPC 20:4	Lipids_Glycerophospholipids	684000	1150000	1640000	4020000	3870000	3930000	143000	165000	144000	319000	418000	455000
Cit262	Positive	468.3	450.5	7.5	467.3	-	LysoPC 14:0 (2n isomer)	Lipids_Glycerophospholipids	40800	67700	99600	124000	77000	77800	19200	14800	19700	7790	12900	12800
Cit263	Positive	496.33	478.3	8.57	495.33	-	LysoPC 16:0 (2n isomer)	Lipids_Glycerophospholipids	175000	250000	297000	753000	488000	487000	37100	36100	44900	27200	42500	428000
Cit264	Positive	524.36	507.4	9.69	523.36	-	LysoPC 18:0	Lipids_Glycerophospholipids	505000	785000	1300000	2760000	1110000	1470000	86700	62900	180000	73000	93700	121000
Cit266	Positive	550.37	245.1	9.81	549.37	-	LysoPC 20:1 (2n isomer)	Lipids_Glycerophospholipids	29400	51500	61400	495000	305000	367000	7600	5410	5680	17700	24600	25800
Cit265	Positive	550.37	245.1	9.9	549.37	-	LysoPC 20:1	Lipids_Glycerophospholipids	31700	49500	65100	523000	345000	371000	6780	5710	5130	16800	27100	29000
Cit1042	Negative	424.2	285.8	7.37	425.2	-	LysoPE 14:0 (2n isomer)	Lipids_Glycerophospholipids	16000	26800	39400	94500	79800	70100	4040	3620	3690	6290	11700	9810
Cit1043	Negative	452.3	255.3	8.55	453.3	-	LysoPE 16:0 (2n isomer)	Lipids_Glycerophospholipids	3030000	5350000	7730000	31600000	20400000	22800000	242000	210000	243000	1040000	1730000	1880000
Cit620	Positive	351	259.8	6.62	350	-	MAG (18:4) isomer1	Lipids_Glycerolipids	6920	6340	9	9	9	9	36200	43300	36700	9	9	9
Cit547	Positive	696.4	696.2	7.53	695.4	-	DGMG (18:2) isomer2	Lipids_Glycerolipids	42400	39800	41100	9	9	9	28300	32100	25900	9	9	9
Cit619	Positive	353.3	261.8	7.53	352.3	-	MAG (18:3) isomer5	Lipids_Glycerolipids	4720000	3990000	3890000	87200	95100	87400	3130000	3080000	2880000	108000	92300	123000
Cit546	Positive	696.4	337.8	8.05	695.4	-	DGMG (18:2) isomer1	Lipids_Glycerolipids	22700	18900	19700	2850	1500	1780	7480	7050	6600	745	930	1170
Cit548	Positive	696.4	696.3	8.24	695.4	-	DGMG (18:2) isomer3	Lipids_Glycerolipids	19800	18300	15100	3120	2140	1600	6630	6910	6130	1330	773	1290
Cit614	Positive	355.1	263.8	8.38	354.1	-	MAG (18:2) isomer1	Lipids_Glycerolipids	41300	35600	34600	9	9	9	39700	37700	32800	9	9	9
Cit621	Positive	351.4	277.8	7.21	350.4	-	MAG (18:4) isomer2	Lipids_Glycerolipids	7040	8390	8300	12400	3330	4180	6550	7570	5420	9	9	9
Cit612	Positive	357.2	339.9	8.8	356.2	-	MAG (18:1) isomer2	Lipids_Glycerolipids	70700	79000	90200	33000	26200	25000	74900	64000	64900	11300	11100	10700
Cit613	Positive	355.1	337.9	10.45	354.1	-	MAG (18:2)	Lipids_Glycerolipids	770000	796000	685000	73000	98300	67000	242000	286000	262000	61300	69000	64600
Cit617	Positive	353.3	335.8	8.55	352.3	-	MAG (18:3) isomer3	Lipids_Glycerolipids	973000	878000	942000	71500	92800	78300	1160000	1110000	1070000	48500	41200	57800
Cit625	Positive	534.4	262.9	9.15	533.4	-	MGMG (18:2) isomer1	Lipids_Glycerolipids	84100	61000	61500	9	9	9	46000	44600	43800	9	9	9
Cit618	Positive	353.1	173.7	9.85	352.1	-	MAG (18:3) isomer4	Lipids_Glycerolipids	95400	92700	79200	4770	7900	6420	39600	40500	38700	8090	7910	8380
Cit545	Positive	694.1	335.8	7.53	693.1	-	DGMG (18:1)	Lipids_Glycerolipids	228000	277000	235000	7740	5810	6250	257000	214000	159000	6790	6010	7170
Cit616	Positive	353.1	261.8	8.33	352.1	-	MAG (18:3) isomer2	Lipids_Glycerolipids	1080000	952000	904000	26800	31800	27800	954000	868000	809000	39400	37800	39800
Cit611	Positive	357.2	339.9	8.69	356.2	-	MAG (18:1) isomer1	Lipids_Glycerolipids	299000	312000	300000	18000	13800	14600	358000	281000	293000	25700	24600	30000
Cit626	Positive	534.1	338	8.99	533.1	-	MGMG (18:2) isomer2	Lipids_Glycerolipids	9630	7690	6230	9	9	9	5610	5800	5520	9	9	9
Cit615	Positive	353.2	261.8	10	352.2	-	MAG (18:3) isomer1	Lipids_Glycerolipids	851000	954000	908000	115000	156000	108000	488000	437000	469000	127000	93800	99100
Cit422	Positive	277.216	157.4	8.47	276.216	-	"14,15-Dehydrocrepenynic acid"	Lipids_Fatty acids	1150000	1410000	1620000	21600	22700	13400	2200000	1580000	1810000	22100	15200	12800
Cit464	Positive	295.2	179.5	9.18	294.2	-	"9-Hydroxy-(10E,12Z,15Z)-octadecatrienoic acid"	Lipids_Fatty acids	82000	88700	79900	47000	33700	27200	128000	138000	139000	45400	43100	35900
Cit697	Positive	279.3	201.5	8.91	278.3	C08364	Punicic acid	Lipids_Fatty acids	151000	164000	293000	104000	71500	44000	212000	200000	203000	36700	43800	63300
Cit670	Positive	279.2	149.4	9.64	278.2	-	"Octadeca-11E,13E,15Z-trienoic acid"	Lipids_Fatty acids	8470000	8330000	8550000	13300000	10100000	11800000	6990000	6610000	8010000	7990000	8210000	8110000
Cit436	Positive	318.3	300.9	6.82	317.3	C12144	4-Hydroxysphinganine	Lipids_Fatty acids	1460000	1600000	1960000	12400000	4450000	8530000	2750000	1350000	2260000	1920000	2010000	2700000
Cit418	Positive	279.2	201.5	10.56	278.2	C06427	α-Linolenic acid	Lipids_Fatty acids	1250000	1200000	772000	161000	298000	297000	1230000	1170000	1410000	384000	368000	235000
Cit1167	Negative	199	181.3	9.62	200	C02679	Lauric acid (C12:0)	Lipids_Fatty acids	7840	6290	9090	5600	3470	5220	9490	8820	10400	3410	4890	3930
Cit1209	Negative	295	183.3	8.92	296	-	"9,10-EODE"	Lipids_Fatty acids	157000	186000	273000	151000	90700	64700	238000	227000	214000	39600	53500	79500
Cit1210	Negative	293	275.4	8.37	294	-	9-HOTrE	Lipids_Fatty acids	238000	273000	341000	4770	3930	3360	452000	370000	371000	3560	3000	2970
Cit1180	Negative	309	291.5	7.8	310	-	13-HpOTrE(r)	Lipids_Fatty acids	7080	7720	4210	3260	4600	3020	7450	7490	8080	5210	4440	5100
Cit1211	Negative	309.1	291.4	7.5	310.1	-	9-HpOTrE	Lipids_Fatty acids	36100	13500	36600	36400	60000	22600	14300	102000	52700	35200	53400	22400
Cit1178	Negative	293	193.2	7.77	294	-	13-HOTrE(r)	Lipids_Fatty acids	134000	59200	118000	133000	115000	52000	53200	166000	119000	89100	133000	71400
Cit1091	Negative	239	223	6.74	240.245	C00517	Palmitaldehyde	Lipids_Fatty acids	651000	1470000	703000	961000	876000	1140000	968000	1010000	1080000	1860000	1010000	1050000
